1 **Enhancing resolution of natural methylome reprogramming behavior in plants**

2  
3 Roberly Sanchez<sup>1†</sup>, Xiaodong Yang<sup>1†</sup>, Hardik Kundariya<sup>2</sup>, Jose R Barreras<sup>1</sup>, Yashitola Wamboldt<sup>2</sup>, and  
4 Sally A. Mackenzie<sup>1\*</sup>

5  
6 <sup>1</sup>Departments of Biology and Plant Science, The Pennsylvania State University, University Park, PA  
7 16802 and <sup>2</sup>Department of Agronomy and Horticulture, University of Nebraska, Lincoln, NE 68588

8  
9  
10  
11  
12  
13  
14  
15  
16 <sup>†</sup>Equal contributors

17  
18 \*Correspondence to: [sam795@psu.edu](mailto:sam795@psu.edu)

19  
20 Sally Mackenzie  
21 362 Frear North Bldg  
22 Pennsylvania State University  
23 University Park, PA 16802  
24 Ph 814-863-8324, email [sam795@psu.edu](mailto:sam795@psu.edu)

25  
26  
27  
28 Roberly Sanchez: [rus547@psu.edu](mailto:rus547@psu.edu)  
29 Xiaodong Yang: [xiaodongy86@gmail.com](mailto:xiaodongy86@gmail.com)  
30 Hardik Kundariya: [kundariyahardik@gmail.com](mailto:kundariyahardik@gmail.com)  
31 Jose R Barreras: [barreras@gmail.com](mailto:barreras@gmail.com)  
32 Yashitola Wamboldt: [yashitola@yahoo.com](mailto:yashitola@yahoo.com)  
33 Sally Mackenzie: [sam795@psu.edu](mailto:sam795@psu.edu)

34

## 35 **Abstract**

36 We have developed a novel methylome analysis procedure, Methyl-IT, based on information  
37 thermodynamics and signal detection. Methylation analysis involves a signal detection problem, and the  
38 method was designed to discriminate methylation regulatory signal from background noise induced by  
39 thermal fluctuations. Comparison with three commonly used programs and various available datasets to  
40 furnish a comparative measure of resolution by each method is included. To confirm results, methylation  
41 analysis was integrated with RNAseq and network enrichment analyses. Methyl-IT enhances resolution of  
42 genome methylation behavior to reveal network-associated responses, offering resolution of gene  
43 pathway influences not attainable with previous methods.

## 44 **Keywords**

45 Epigenomics, DNA methylation, gene expression, information theory, Arabidopsis, tomato  
46  
47

## 48 **Background**

49 Most chromatin changes that are associated with epigenetic behavior are reprogrammed each generation,  
50 with the apparent exception of cytosine methylation, where parental patterns can be inherited through  
51 meiosis [1]. Genome-wide methylome analysis, therefore, provides one avenue for investigation of  
52 transgenerational and developmental epigenetic behavior. Complicating such investigations in plants is  
53 the dynamic nature of DNA methylation [2, 3] and a presently incomplete understanding of its association  
54 with gene expression. In plants, cytosine methylation is generally found in three contexts, CG, CHG and  
55 CHH (H=C, A or T), with CG most prominent within gene body regions [4]. Association of CG gene  
56 body methylation with changes in gene expression remains in question. There exist ample data  
57 associating chromatin behavior with plant response to environmental changes [5], yet, affiliation of  
58 genome-wide DNA methylation with these effects, or their inheritance, remains inconclusive [6, 7].  
59

60 The epigenetic landscape is modulated by thermodynamic fluctuations that influence DNA stability.  
61 Most genome-wide methylome studies have relied predominantly on statistical approaches that ignore the  
62 subjacent biophysics of cytosine DNA methylation, offering limited resolution of those genomic regions  
63 with highest probability of having undergone epigenetic change. Jenkinson and colleagues [8] described  
64 the implementation of statistical physics and information theory to the analysis of whole genome  
65 methylome data to define sample-specific energy landscapes. Our group [9, 10] has proposed an  
66 information thermodynamics approach to investigate genome-wide methylation patterning based on the  
67 statistical mechanical effect of methylation on DNA molecules. The information thermodynamics-based

68 approach is postulated to provide greater sensitivity for resolving true signal from thermodynamic  
69 background within the methylome [9]. Because the biological signal created within the dynamic  
70 methylome environment characteristic of plants is not free from background noise, the approach,  
71 designated Methyl-IT, includes application of signal detection theory [11-14].

72

73 A basic requirement for the application of signal detection is a probability distribution of the background  
74 noise. Probability distribution, as a Weibull distribution model, can be deduced on a statistical  
75 mechanical/thermodynamics basis for DNA methylation induced by thermal fluctuations [9]. Assuming  
76 that this background methylation variation is consistent with a Poisson process, it can be distinguished  
77 from variation associated with methylation regulatory machinery, which is non-independent for all  
78 genomic regions [9]. An information-theoretic divergence to express the variation in methylation induced  
79 by background thermal fluctuations will follow a Weibull distribution model, provided that it is  
80 proportional to minimum energy dissipated per bit of information from methylation change.

81

82 The information thermodynamics model was previously verified with more than 150 Arabidopsis and  
83 more than 90 human methylome datasets [9]. To test application of the Methyl-IT method to methylome  
84 analysis, and to compare resolution of the Methyl-IT approach to publicly available programs DSS [15],  
85 BiSeq [16] and Methylpy [17], we used three Arabidopsis methylome datasets. Genome-wide  
86 methylation data from a Col-0 single-seed decent population [3], maintained over 30 generations under  
87 controlled growth conditions, provides a measure of thermodynamic properties within an unperturbed  
88 system. To assess resolution of methylation signal during plant development, we included previously  
89 reported datasets from various stages of seed development and germination in Arabidopsis ecotypes Col-0  
90 and Ws [18]. Both of these systems have been described for methylome behavior with Methylpy, and  
91 direct comparison of the two datasets allowed estimation of developmental epigenetic signal above  
92 background. For more detailed study of methylation and gene expression, and to provide empirical testing  
93 of Methyl-IT predictions, we focused on the trans-generational ‘memory’ line derived by suppression of  
94 the *MSH1* (*MUTS HOMOLOG 1*) gene [19, 20], which has not been previously described for methylome  
95 features.

96

97 *MSH1* is a plant-specific gene that encodes an organelle-localized protein [21, 22]. Plastid-depletion of  
98 MSH1 conditions ‘developmental reprogramming’ in the plant [23]. The *msh1* mutant is altered in  
99 expression of a broad array of environmental and stress response pathways [24], and the mutant  
100 phenotype is also produced by *MSH1* RNAi knockdown [20]. Differentially expressed gene (DEG)  
101 analysis of the *msh1* TDNA mutant identifies major components from numerous abiotic and biotic stress,

102 phytohormone, carbohydrate metabolism, protein translation and turnover, oxidative stress and  
103 photosynthetic pathways [24]. Subsequent null segregation of the RNAi transgene restores *MSH1*  
104 expression but leaves a heritably altered phenotype, with delayed flowering, reduced growth rate, delayed  
105 maturity transition and pale leaves [20]. This condition is termed *msh1* ‘memory’, and provides for direct  
106 investigation of transgenerational methylation variation and its association with altered gene expression.

107  
108 Here, we report on Methyl-IT sensitivity relative to three commonly used methylome analysis programs.  
109 We demonstrate resolution of methylome repatterning by Methyl-IT analysis, and empirical validation of  
110 gene networks undergoing changes in methylation and gene expression as identified by the Methyl-IT  
111 procedure.

112

## 113 **Results**

### 114 **The Methyl-IT method**

115 For resolution of DNA methylation signal, we employed Hellinger divergence ( $H$ ) as a means of  
116 quantifying dissimilarity between two probability distributions: that associated with a reference, defining  
117 background changes, and that associated with treatment.

118

119 Signal detection is a critical step to increase sensitivity and resolution of methylation signal by reducing  
120 the signal-to-noise ratio and objectively controlling the false positive rate and prediction accuracy/risk  
121 (Fig. 1). Optimal detection of signals requires knowledge of the noise probability distribution that, from a  
122 statistical mechanical basis, can be modeled for each individual sample by a Weibull distribution [9]. The  
123 methylation regulatory signal does not hold Weibull distribution and, consequently, for a given level of  
124 significance  $\alpha$  (Type I error probability, eg.  $\alpha = 0.05$ ), cytosine positions with  $H_{\alpha=0.05}$  can be selected as  
125 sites carrying potential signals (shown as the blue region under the curve in Fig.1). Laws of statistical  
126 physics can account for background methylation, a response to thermal fluctuations that presumably  
127 function in DNA stability [9]. True signal is detected based on the optimal cutpoint [25], which can be  
128 estimated from the area under the curve (AUC) of a receiver operating characteristic (ROC) built from a  
129 logistic regression performed with the potential signals from controls and treatments. In this context, the  
130 AUC is the probability to distinguish biological regulatory signal naturally generated in the control from  
131 that induced by the treatment. In this context, the cytosine sites carrying a methylation signal are  
132 designated *differentially informative methylated positions* (DIMPs). The probability that a DIMP is not  
133 induced by the treatment is given by the probability of false alarm ( $P_{FA}$ , false positive). That is, the  
134 biological signal is naturally present in the control as well as in the treatment.

135  
136 Estimation of optimal cutoff from the AUC is an additional step to remove any remaining potential  
137 methylation background noise that still remains with probability  $\alpha = 0.05 > 0$ . We define as methylation  
138 signal (DIMP) each cytosine site with Hellinger divergence values above the cutoff ( $H_{33}^{D_r}$ ), as shown in  
139 Fig. 1. Each DIMP is a cytosine position carrying a significant methylation signal, which may or may not  
140 be represented within a differentially methylated position (DMP) according to Fisher's exact test (or other  
141 current tests, Fig. 1). The difference in resolution by current methods versus Methyl-IT is illustrated by  
142 positioning  $H$  value sensitivity of the Fisher's exact test (FET) at greater than  $H_{min}$  for cytosine sites that  
143 are DMP and DIMPs simultaneously. For example, the ROC curve that corresponds to logistic regression  
144 for potential signals from the closest wild type control to *msh1* memory line (control 3 and treatment 1 in  
145 Fig. 1) has an AUC cutpoint of  $H = 1.028052$ .

146  
147 The probability of false alarm (estimated for best fit found for the Weibull cumulative distribution of  $H$  in  
148 the mentioned control) for DIMP detection based on the mentioned cutpoint is  $P_{FA} = 1.466 \times 10^{-6}$ . Thus, in  
149 the *msh1* memory line dataset under study, any cytosine position  $k$  with  $H_k \geq 1.028052$  is a DIMP.  
150 Although the probability  $P_{FA} = 1.466 \times 10^{-6}$  is small, there is still an average of 44844 CG-DIMPs per wild  
151 type sample. The average of CG-DIMPs in the memory line samples is 225835. We found that the  
152 strength of biological regulatory signal (evaluated in terms of AUC) was different for each methylation  
153 context. The strongest signal by Hellinger divergence found in our analyses was in CG context. A  
154 parsimony decision to reduce the rate of false positives used the cutpoint estimated for the AUC from the  
155 strongest signal. A flow chart of Methyl-IT analysis, with integration of these major procedures described  
156 above, is shown in Fig. 2.

### 157 158 **Relative sensitivity of the Methyl-IT method versus other procedures**

159 Table 1 provides a critical but nonunique example for the 2x2 contingency table with read counts  
160  $n_i^{mC_c} = 8$ ,  $n_i^{C_c} = 2$ ,  $n_i^{mC_t} = 350$ , and  $n_i^{C_t} = 20$ . In this situation, and for any value  $80 \leq n_i^{mC_t} \leq 350$ ,  
161 there exists strong methylation signal in the treatment, significantly stronger than in the control, but a 2x2  
162 contingency independence test cannot detect it. Even small genomes like Arabidopsis contain millions of  
163 methylated cytosine sites, and situations analogous to the one presented in Table 1 are not rare. If this  
164 hypothetical cytosine site were to occur in the memory line, with  $n_i^{mC_t} = 350$ , then, according to its  $p$ -  
165 value estimate from the corresponding Weibull distribution, it would be a potential signal included in the  
166 logistic regression and, since  $H = 1.12$  in this example and AUC cutpoint  $H_{cutpoint} = 1.028$ , it would be a  
167 DIMP ( $H_{cutpoint} < H$ ).

168  
169 In the memory line, 100% of differentially methylated cytosines ( $TVD > 0.23$ ) in all methylation contexts  
170 found by root-mean-square test (RMST, bootstrap test of goodness-of-fit [26] implemented in methylpy  
171 [17]), Fisher exact test (FET), and HDT (bootstrap test of goodness-of-fit based on Hellinger divergence,  
172 see methods) are also detected by Methyl-IT (Fig. 3). RMST does not detect 17.7% of CG-DIMPs, 47.8%  
173 CHG-DIMPs, and 59.7% CHH-DIMPs. HDT does not detect 19.7% of CG-DIMPs, 51.5% CHG-DIMPs,  
174 and 66.1% CHH-DIMPs, while FET does not detect 46.2% of CG-DIMPs, 73.9% CHG-DIMPs, and 84%  
175 CHH-DIMPs. Together, RMST, HDT and FET do not detect 13.5% of CG-DIMPs, 43.2% CHG-DIMPs,  
176 and 52.5% CHH-DIMPs. The DIMPs not detected by these alternative approaches come from situations  
177 analogous to that presented in Table 1. RMST is a robust test of goodness-of fit for 2x2 contingency  
178 tables. The statistic used in RMST is an information divergence. Results obtained with RMST were very  
179 close to those estimated based on Hellinger divergence [26, 27](see Table 1). Therefore, the differences in  
180 outcome between Methyl-IT and Methylpy do not reside in RMST but, rather, in the signal detection  
181 limitation, which requires knowledge of the null distribution for methylation background variation. The  
182 null distribution of the control sample testing statistic must be taken into account.

183  
184 Relative sensitivity and resolution of the Methyl-IT method can also be assessed by parallel analyses of  
185 the three datasets, generational, seed development and *msh1* memory. Fig. 4 shows a single-scale, direct  
186 comparison of differential methylation behavior in these datasets. Rather than total DIMP number, we  
187 present relative. The absolute DIMP counts and DIMP counts per genomic region are provided in the  
188 Additional File 2 Table.S1 for seed development and germination dataset. In Fig. 4, DIMP number is  
189 normalized to the corresponding local cytosine context number. The signal detection step of Methyl-IT  
190 discriminates signal unique to the sample from background patterning changes shared within the control  
191 without regard to DMP density. Consistent with expectations, the generational dataset displays lowest  
192 level variation across lineages, with greater inter-lineage variation than generational, and highest DIMP  
193 signal in CG context. Direct comparison between the generational and seed development studies  
194 estimated pattern and magnitude differences between the two datasets. Methylation signal in the seed  
195 development dataset taken from the original study by Kawakatsu et al. [18] was greater than that of the  
196 generational study, with DIMP signal in all three CG, CHG, CHH contexts. CHG and CHH changes were  
197 associated predominantly with non-genic and TE regions, and CG DIMPs showed higher density within  
198 gene regions (Fig. 4). Analysis of *msh1* memory, when compared to the generational and seed  
199 development data, showed significantly greater magnitude change and prevalent methylation DIMP signal  
200 within genic CG context. Genome-wide analysis of methylation in the memory line, enhanced by signal  
201 detection, revealed considerable CG, CHG and CHH DIMPs across all chromosomes. Results are shown

202 for data before (Fig. 3) and after (Fig. 4 and Additional file 1: Figure S1) normalization to demonstrate  
203 that while the vast majority of methylation resides in CHH context, normalized for density, changes in  
204 CG context predominated on chromosome arms (Additional file 1: Figure S1).

205  
206 A hierarchical cluster based on AUC criteria, and built on the set of 7006 selected DIMPs associated  
207 genes, permitted the classification of seed developmental stages into two main groups: morphogenesis  
208 and maturation phases (Additional File 1 Figure. S2a). In this case, the methylation signal was expressed  
209 in terms of  $\log_2(\text{DIMP-counts on gene})$ . Within the 7006-dimensional metric space generated by 7006  
210 AUC-selected genes, the linear cotyledon (*COT*) and mature green (*MG*) stages (morphogenesis-  
211 maturation phase) grouped into a cluster quite distant from the cluster of post mature green (*PMG*) and  
212 dry seed (*DRY*) stages (Dormancy phase). The latter cluster was closer to the leaf dataset derived from 4-  
213 week-old plants. Similar analysis was performed for the seed germination experiment from the mentioned  
214 study, and a hierarchical cluster built on the set of 3864 selected genes based on AUC criteria permitted  
215 the classification of seed developmental stages into two main groups: 1) dormancy and 2) germination-  
216 emerging phases (Additional File 1 Figure S2b).

217

## 218 **Differentially methylated genes (DMG)**

219 Here we propose the concept of differentially methylated genes (DMGs) based on the comparison of  
220 group DIMP counts by applying generalized linear regression model (GLM). In particular, the use of  
221 DMRs (clusters of DMPs within a specified region), can be tested in a group comparison by applying  
222 GLM.

223

224 Genes displaying a statistically significant difference in the number of DIMPs relative to control were  
225 defined as DMGs. Additional File 3 Table.S2 shows the number of DMGs observed in the seed  
226 development data, based on Methyl-IT analysis. In this case, the analysis included DIMPs, regardless of  
227 hypo or hyper methylation direction, and from all cytosine methylation contexts. Genes were defined as  
228 the region covered by gene body plus 2kb upstream of the gene start site.

229

230 The number of DMGs (1068 genes) is considerably lower than the number of genes associated with  
231 DMRs derived in the original study by Kawakatsu et al. (2017) [18]. Methylpy-derived DMR number  
232 reflects genomic intervals with a given density of cytosine methylation changes, defined relative to a  
233 control. Methyl-IT DMG number reflects gene regions with highest probability of differential methylation  
234 distinct from background activity in the control. For example, after combining the embryogenesis CG,

235 CHG, and CHH DMRs reported in Kawakatsu et al. [18] (Table S5 from [18]) into a single set of DMRs,  
236 only 468 from 6433 DMR-associated genes (after removing duplicated genes and updating annotation)  
237 were Methyl-IT DMGs that met our GLM criteria in the group comparison of maturation phase versus  
238 morphogenesis phase (Additional File 1 Figure S3a). DMR-associated gene analysis was also performed  
239 with the set of DMRs detected in the germination experiment from the same study [18]. Similarly, 53  
240 from 7638 DMR-associated genes were identified DMGs that met our GLM criteria in the group  
241 comparison of germination-emerging versus dormancy phases (Additional File 1 Figure S3b ). In this  
242 case, 7638 DMR-associated genes comprise the resulting set from pooling germin-CHG and germin-CHH  
243 DMRs (as reported in Table S5 from reference [18]). Analysis for the set of all genes yielded 136 DMGs  
244 (Additional File 1 Figure S3c).

245  
246 To more generally investigate the relative efficacy of commonly used methylation analysis programs, we  
247 applied DSS, BiSeq and Methylpy to the *msh1* memory line and corresponding Col-0 control methylome  
248 datasets. The control line was acquired as a transgene-null within the same transformation experiment that  
249 produced MSH1-RNAi lines from which the memory line derives, and has been grown in parallel each  
250 subsequent generation. The overlaps of DMR-associated genes from DMRs found in the memory line by  
251 the methylome analysis pipelines DSS, BiSeq, and Methylpy is presented in Fig. 5a. What is striking is  
252 the degree of data non-conformity from the three methods. Because the subjacent algorithms of these  
253 programs are based not only on different statistical and computational approaches and do not define  
254 DMRs uniformly, the data output differs in sensitivity and methylation change criteria. The application of  
255 GLM to estimate the DMG set by Methyl-IT and its overlap with DMR-associated genes retrieved from  
256 DMRs identified by the mentioned programs is shown in Fig. 5b. For the group comparison counting only  
257 gene-body DIMPs, a total of 9271 loci (from the entire set of genes) were identified as DMGs in the *msh1*  
258 memory line (Additional file 4: Table S3), while 8798 DMGs were identified for the group comparison  
259 counting DIMPs within gene body plus 2kb upstream and downstream (with  $TVD > 0.15$ ). The  
260 application of GLM in estimating DMGs is not implemented to identify DMRs, but to evaluate whether  
261 or not a statistically significant difference exists between methylation signals observed in two individual  
262 groups for an already defined DMR.

263

#### 264 **Methyl-IT identifies gene networks in seed development and germination dataset**

265 If heightened sensitivity in methylome signal detection imparts added biological information, this should  
266 be evident in tests for association of methylome signal with gene expression changes. Observed CG and  
267 CHG signal implies that changes in methylation during seed development relate to gene expression and/or



268 developmental transitioning. To investigate this possibility further, we conducted a network enrichment  
269 analysis test (NEAT) of the Methyl-IT output from seed development and germination datasets.

270  
271 Analysis of data from stages of seed development, including cotyledonary, mature green and post-mature  
272 green, contrasted to globular as reference, suggested a methylome repatterning following the mature  
273 green stage (Additional File 1 Figure. S2). Data indicate that methylome patterns are more similar  
274 between cotyledonary and mature green stages, transitioning to a distinguishable state for post-mature  
275 green and dry seed. This methylome transition may relate to the dessication and dormancy shift that also  
276 occurs with this timing [28, 29]. Further analysis of differentially methylated loci with NEAT detected  
277 statistically significant network enrichment of links between genes from the set of DMGs (Ws-0 seed)  
278 and the set of GO-biological process terms associated with seed functions (Table 2). The list of genes  
279 found in networks includes genes known to participate in seed development such as, For example,  
280 transcription factors *DPBF2* (*AT3G44460*) from an abscisic acid-activated signaling pathway expressed  
281 during seed maturation in the cotyledons, *ABSCISIC ACID BINDING FACTOR* (*ABF1*, *AT1G49720*), and  
282 *WRKY22* (*AT4G01250*) a member of *WRKY* transcription factors involved mainly in seed development.  
283 Other genes were found to be involved in seed dormancy, like *SLY1* (*SLEEPY1*), and seedling  
284 development, like *EIN4* (*AT3G04580*), *CML16* (*AT3G25600*) (full gene list in Additional file 5: Table  
285 S4). GeneMANIA (<http://www.cytoscape.org/>), identified interaction networks within the data, indicating  
286 that many DMGs in the seed development dataset function together (Additional file 1: Figure S4).

287  
288 Similar analysis of the seed germination and the Col-0 single-seed decent datasets did not detect DMGs  
289 within networks. Results in the single-seed decent generational study are consistent with expectations,  
290 since samples were grown under controlled conditions and sampled uniformly over generations. In the  
291 case of the seed germination dataset, this outcome may be consistent with the fact that only CHG and  
292 CHH DMRs were found in the original seed germination study by Kawakatsu et al. (2017) [18], while the  
293 seed developmental experiment showed 60% of CG DMRs overlapping with protein-coding genes. These  
294 data suggest that methylome signal may be more prominent under particular developmental transitions,  
295 like seed preparation for dormancy and dessication, than during processes like germination.

296

### 297 **The memory line phenotype**

298 Transgene-null plants following segregation of the *MSH1*-RNAi transgene, termed *msh1* ‘memory’ lines,  
299 display full penetrance and transgenerational inheritance of the altered phenotype, and the *msh1* memory  
300 effect recapitulates in tomato [30]. Arabidopsis lines that have undergone silencing of *MSH1* segregate  
301 for the *MSH1*-RNAi transgene by self-crossing to produce heritable phenotype changes in ca. 7-25% of

302 the resulting transgene-null progeny (Fig. 6a). The *msh1* memory phenotype is milder and more uniform  
303 than that observed in *msh1* mutants derived by point mutation, T-DNA mutation or RNAi suppression [19,  
304 20, 23] (Fig. 6b). Memory lines show normal *MSH1* transcript levels (Fig. 6c), but 100% penetrance and  
305 heritability of the altered phenotype in subsequent self-crossed generations. Over 3,000 RNAi-null  
306 memory line progeny under greenhouse conditions produced neither visible reversion to wild type nor  
307 more severe *msh1* phenotypes (Additional file 1: Figure S5). In Arabidopsis, memory lines were stably  
308 carried forward four generations and, in tomato, ten generations to date.

309

### 310 **Memory line methylome changes detected by Methyl-IT associate with gene expression**

311 The derived transgene-null *msh1* memory lines display gene expression changes in ca. 955 genes  
312 (Additional file 6: Table S5), approximately 67% of which are shared with the *msh1* mutant (Additional  
313 file 7: Tables S6, Additional file 6: Tables S5).

314

315 The memory line DEG profile is distinctive. Unlike the mutant, which shows widespread gene ontology  
316 enrichment in nearly every stress response pathway (Additional file 7: Table S6), memory line gene  
317 ontology enrichment shows skewing toward integrated pathways for circadian clock, starch metabolism,  
318 and ethylene and abscisic acid response (Fig. 6d). These studies use the *msh1* TDNA insertion mutant  
319 rather than transgenic MSH1-RNAi for comparisons to ensure that each plant is *msh1*-depleted.

320 Transgenic RNAi knockdown lines are variable for *MSH1* suppression across plants (Fig. 6c), potentially  
321 confounding interpretation, and MSH1-RNAi and *msh1* TDNA mutant appear identical in phenotype (Fig.  
322 6b).

323

324 Application of Network-Based Enrichment Analysis (NBEA) to the set of 955 DEGs in the memory line  
325 detected over-enrichment in five pathways: “*circadian rhythm*”, “*response to red or far red light*”,  
326 “*regulation of circadian rhythm*”, “*long-day photoperiodism/flowering*”, and “*regulation of*  
327 *transcription*”. The permutation test applied to these data indicates that the observed simultaneous over-  
328 enrichment of these pathways by chance holds a probability of lower than  $4 \times 10^{-5}$ , reflecting a non-random  
329 outcome (Additional file 8: Table S7).

330

### 331 **The *msh1* “memory” is a candidate system for non-genetic methylome reprogramming**

332 Similar to investigation of methylation changes during seed development and germination, we followed  
333 Methyl-IT analysis of *msh1* memory line data with NEAT and network-based enrichment analysis  
334 (NBEA) to assess biologically meaningful data based on DMGs alone. Additional file 9: Table S8 shows

335 results classifying methylation signal into networks for circadian clock, abscisic acid-activated signaling,  
336 and defense response. Approximately 32% of identified DEGs overlap with DMGs in the memory line  
337 (Fig 7a). These differentially methylated and expressed loci are over-enriched for genes contributing to  
338 circadian rhythm, plant hormone signal transduction, and MAPK signaling pathway (Fig. 7b-7d).  
339 Network analysis of expression, shown in (Fig. 7b-7d), suggests dysregulation of these pathways in  
340 *msh1* memory.

341  
342 Integration of independently derived DEG, DMG and NBEA data from the memory lines converged on  
343 16 loci (Fig. 7a and Table 3), of which 10 directly participate in circadian rhythm regulation and the  
344 remainder, associated with light, ABA and ethylene response, are directly influenced by circadian clock  
345 regulators (Table 3). Principal component (PC) analyses based on the mean of CG- Hellinger divergence  
346 covering the gene regions delimited by DMGs (Fig. 8a), DMG/DEG intersection (Fig. 8b) and the  
347 mentioned 16 loci (Fig. 8c) suggest a distinctive role of gene-associated CG methylation in *msh1*-memory  
348 effect. For all analyses, more than 80% of variance among wild type, *msh1* memory and *msh1* TDNA  
349 mutant was explained on the plane PC1-PC2, where *msh1* memory effect is clearly distinguishable from  
350 control. Quantitative discriminatory power of CG methylation in the 16 signature loci is reflected in  
351 hierarchical clustering based on their PC1-PC2 coordinates (Fig. 8d) and in their strong correlation with  
352 the first two components (Fig. 8e). In particular, eight circadian rhythm genes strongly correlate with PC1,  
353 which carries 65% of the whole sample variance. Thus, for these genes, CG methylation conveys enough  
354 discriminatory power to distinguish individual wild type phenotypes from the *msh1* memory effect.

355  
356 These observations are the first inference of association between CG methylation and gene expression  
357 changes in the *msh1* memory line. DIMP distribution along the 16 signature loci showed most CG and  
358 non-CG DIMPs located within exonic regions in memory lines with little individual CG-DIMP variation  
359 (sometimes balanced with non-CG), suggesting that a programmed distribution pattern might exist  
360 (Additional file 10: Table S9).

361  
362 Predicted changes in methylation pattern at core circadian clock genes were subsequently confirmed by  
363 sequence-specific bisulfite (BS) PCR analysis (Fig. 9a-9d). DIMPs were confirmed in the memory line at  
364 *GI*, *TOC1*, *LHY* and *CCA1* genes. BS-PCR primer set BS-GI-P2, designed to bind to a predicted DIMP-  
365 rich region, confirmed DIMPs within the region (Fig. 9e), while primer set BS-GI-P7, designed to bind to  
366 a DIMP-free region, detected no changes (Fig. 9f). The DNA bisulfite conversion rate in this experiment  
367 was confirmed by using *DDMI* as control, with a calculated bisulfite conversion rate of 99.47% for WT  
368 and 100% for memory line sample (Additional file 1: Figure S6).

369  
370 Germination of the memory line and isogenic Col-0 wild type on media containing 100  $\mu$ M 5-azacytidine  
371 alleviated the phenotype differences between the two lines, resulting in similar growth rates (Additional  
372 file 1: Figure S7). Transfer to potting media to assess later growth showed wild type and memory lines to  
373 be similar in phenotype following treatment (Additional file 1: Figure S7). Likewise, RNAseq analysis of  
374 the treated and untreated memory and control lines showed 5-azacytidine treatment had genome-wide  
375 effects on the gene expression pattern of both *msh1* memory line and wild type, and brought overall gene  
376 expression patterns of treated *msh1* memory line and wild-type closer than before treatment (Additional  
377 file 1: Figure S8). These observations reflect association between DNA methylation behavior and the  
378 altered phenotype.

379  
380 Wild type and memory line plants treated with 5-azacytidine were also tested for changes in expression of  
381 the sixteen identified loci shown in Table 3. Quantitative RT-PCR assays confirmed previous RNAseq  
382 results, showing significant differences in steady state transcript levels for 14 of the 16 loci in wild type  
383 versus memory line plants growing under no treatment conditions (Additional file 1: Figure S9). Plants  
384 germinated in 5-azacytidine prior to transfer to growth media, however, produced no significant  
385 differences in gene expression for these loci in memory lines versus wild type (Additional file 1: Figure  
386 S9). These data show a relationship between methylation state and gene expression changes in *msh1*-  
387 induced memory, and provide evidence that altering methylation via chemical treatment can return gene  
388 expression to nearly wild type steady state levels for these loci within the time period assayed.

389

### 390 **The *msh1* memory effect is related to circadian rhythm changes**

391 Both gene expression and methylome datasets, analyzed independently, indicated alteration in  
392 components of the circadian clock. To test for modified circadian oscillation behavior in *msh1* memory,  
393 gene expression levels for 4 core circadian clock genes in Arabidopsis and 2 genes in tomato were  
394 evaluated over a 48-h time course under constant light (LL) and light-dark cycles (LD). Results confirmed  
395 a degree of circadian rhythm dysregulation for all tested loci in both Arabidopsis memory lines, with  
396 varying levels of altered expression (Fig 10). DEG analysis in Arabidopsis showed that the proportion of  
397 genes regulated by *TOC1/CCA1* and altered in expression increased from 10.4% in the *msh1* T-DNA  
398 mutant line to 33.1% in the *msh1* memory line (Fig 11a). Memory-associated processes identified in  
399 Figure 6d, starch metabolism and cold, ethylene and abscisic acid response, are circadian clock output  
400 pathways [31] (Fig 11b-e), again signifying that methylome repatterning influences genes that function  
401 coordinately. The altered expression of three genes from these pathways was confirmed in Arabidopsis by

402 qRT-PCR (Additional file 1: Figure S10). Data to date suggest that circadian clock dysregulation  
403 contributes to the memory line phenotype; it is not yet known whether clock dysregulation acts causally  
404 in memory programming.

405

## 406 **Comparable memory effects are detected in tomato**

407 The *msh1* effect is recapitulated across plant species [23, 30]. We exploited this observation by  
408 comparing *msh1* memory lines in Arabidopsis and tomato (cv ‘Rutgers’). Genome-wide methylome  
409 (BSseq) data were derived from Rutgers wild type and *MSH1*-RNAi transgene-null lines (fifth  
410 generation). Similar to Arabidopsis, tomato memory lines are attenuated and more uniform in phenotype  
411 relative to RNAi suppression lines, described by Yang et al. (2015)[30], and display reduced growth rate  
412 and delayed flowering.

413

414 To test Methyl-IT analysis value in a dataset derived from another plant species, and to learn whether  
415 signature pathways identified in Arabidopsis *msh1* memory line are shared in tomato *msh1* memory, we  
416 conducted parallel analysis with the derived tomato memory line methylome dataset. Available gene  
417 annotation in tomato is incomplete. Therefore, identified differentially methylated tomato loci were cross-  
418 referenced to Arabidopsis orthologs. We identified 7802 tomato DMGs (Additional file 11: Table S10).  
419 About 4277 of them were shared with Arabidopsis, accounting for ca. 55% of tomato DMGs and 46% of  
420 Arabidopsis DMGs (Fig. 12a). With NBEA analysis, we identified 147 tomato genes predominantly  
421 associated with phytohormone response, including auxin, salicylic acid, ethylene and ABA pathways,  
422 together with circadian regulators, abiotic and biotic stress genes, and light response (Additional file 12:  
423 Table S11). Arabidopsis homologs for 43% (63) of these 147 genes were found in Arabidopsis DMGs by  
424 NBEA (Additional file 13: Table S12). Homologs for 6 of the 16 loci identified in Arabidopsis and listed  
425 in Table 3 were present in the list of 147 tomato genes. Similar circadian clock dysregulation was  
426 observed in tomato *msh1* memory as in its Arabidopsis counterparts. Gene expression levels for 2 core  
427 circadian clock genes, *Sl\_TOC1* (*Solyc06g069690*) and *Sl\_LHY* (*Solyc10g005080*) in tomato were  
428 evaluated over a 48-h time course under light-dark cycles (LD) to confirm dysregulation (Fig. 12b), along  
429 with downstream circadian clock-regulated genes (Fig. 12c). Together, these data reflect cross-species  
430 conservation underlying *msh1* memory.

## 431 **Discussion**

432 Methyl-IT draws from the perspective that DNA methylation functions to stabilize DNA [32-34] and, as  
433 such, may exist in “activated” versus “maintenance” states with regard to bioenergetics. We have begun

434 to investigate DNA methylation patterning as a “language” of sorts, identifying pattern changes that  
435 comprise “signal” in response to treatment, without regard to density of methylation changes within a  
436 given interval. While the theoretical premise underlying our approach, and based on Landauer’s principle,  
437 is detailed elsewhere [9, 10], the present study compares resolution of this methodology to current  
438 methods for analysis of whole-genome methylation datasets.

439

440 Methyl-IT permits methylation analysis as a signal detection problem. Our model predicts that most  
441 methylation changes detected, at least in Arabidopsis and tomato, represent methylation “background  
442 noise” with respect to methylation regulatory signal, and are explainable within a statistical probability  
443 distribution. Implicit in our approach is that DIMPs can be detected in the control sample as well. These  
444 DIMPs are located within the region of false alarm in Fig. 1, and correspond to natural methylation signal  
445 not induced by treatment. Thus, using the Methyl-IT procedure, methylation signal is not only  
446 distinguished from background noise, but can be used to discern natural signal from that induced by the  
447 treatment.

448

449 Whereas Methylpy, DSS and BiSeq provide essential information about methylation density, context and  
450 positional changes on a genome-wide scale, Methyl-IT provides resolution of subtle methylation  
451 repatterning signals distinct from background fluctuation. Data derived from analysis with Methylpy,  
452 BiSeq or DSS alone could lead to an assumption that gene body methylation plays little or no role in gene  
453 expression, or that transposable elements are the primary target of methylation repatterning. Yet ample  
454 data suggest that this picture is incomplete [35]. Methyl-IT results show that these conclusions more  
455 likely reflect inadequate resolution of the methylome system. GLM analysis applied to the identification  
456 of DMR-associated genes by Methylpy, BiSeq and DSS indicates that DMRs (or DMR associated genes)  
457 do not provide sufficient resolution to link them with gene expression.

458

459 Signal detected by Methyl-IT may reflect gene-associated methylation changes that occur in response to  
460 local changes in gene transcriptional activity. Comparative analysis of the *msh1* memory line data with  
461 *msh1* T-DNA mutant, a more extreme phenotype, showed 42.3% of memory line DMGs (3921 out of  
462 5354) to overlap with *msh1* T-DNA DEGs. With the memory line DEGs estimated to number only 935,  
463 it is possible that methylation repatterning within the memory line serves to stabilize or re-establish gene  
464 expression following the extreme, stress-related changes that accompany *MSH1* silencing [24]. Similarly,  
465 the pathway-associated methylome changes detected in seed development data may reflect participation

466 of methylation in gene expression stage transitions, particularly prominent between green mature and  
467 post-green mature stages.

468  
469 Methyl-IT analysis of various stages in seed development and germination showed evidence of  
470 methylation changes. Previous Methylpy output [18] defined predominant changes in non-CG  
471 methylation residing within TE-rich regions of the genome, whereas Methyl-IT data resolved statistically  
472 significant methylation signal within gene regions. With the complementary resolution provided by  
473 Methyl-IT, it becomes possible to investigate the nature of chromatin response within identified genes in  
474 greater detail during the various stages of a seed's development. Several of the identified DMGs in this  
475 study involved genes that interact within known development pathways.

476  
477 There is little detail available in plants of local intragenic methylation behavior during transitions in gene  
478 activation, but transcription factor-associated recruitment of methylation machinery has been postulated  
479 [35], and supported by data in other systems [36]. A large proportion of the intervals identified by this  
480 study are components of signal transduction, so expression effects may be below the detection limits of  
481 the assay. Among the 1717 transcription factors reported in PlantTFDB, 340 are identified as DMGs in  
482 our list for memory line. Effects of alternative splicing in memory changes, also known to respond to  
483 local methylation [37], would similarly have escaped detection in our gene expression analysis. However,  
484 for a better comprehension of which genes would be controlled by the regulatory methylation machinery  
485 in processes like seed developmental or the induced *msh1* memory effect, the network enrichment  
486 analysis of DMGs and DEGs can reduce the number of potential regulators to a minimal number of genes  
487 testable under lab conditions, as presented in our study. Analysis produced evidence of a relationship  
488 between *msh1* memory line gene expression and differential methylation data for at least 16 regulatory  
489 loci, 10 of which comprise components of the circadian clock.

490  
491 Plants have the capacity to respond to a wide array of abiotic and biotic stresses and developmental cues  
492 through overlapping gene networks. It is increasingly evident that phytohormone, light response, abiotic  
493 and biotic stress response, photosynthesis and carbohydrate metabolism are integrated output pathways of  
494 the plant's circadian clock [31]. A significant proportion of the plant's gene expression profile is  
495 influenced by circadian regulation [38], introducing the concept of a master regulator of adaptation.  
496 Numerous reports underscore extensive pathway integration under circadian clock control, with starch  
497 metabolism, cold response and abscisic acid-mediated stress response, for example, as particularly  
498 prominent pathways altered by *msh1* memory. The link between plant response to cold and epigenetic  
499 memory involves histone modifications of the FLC locus during vernalization [39]. Cold temperature also

500 influences alternative splicing patterns of clock genes to alter their function [40]. ABA, a stress hormone,  
501 shows rhythmic diel levels in plants [41], and associates with *TOCI* and an ABA-related gene, *ABAR*, in  
502 a highly regulated feedback loop [42]. Epigenetic modification of circadian clock genes effect changes in  
503 starch metabolism [43], and can induce enhanced growth vigor in hybrids and allopolyploids [44]. Studies  
504 of classical heterosis in *Arabidopsis* also show association with changes in circadian clock behavior [45].  
505 Data from this study indicate that *MSH1* suppression includes circadian clock, ABA and ethylene  
506 dysregulation as components of the associated *msh1* global stress condition. Segregation of the *MSH1*-  
507 RNAi transgene only partially reverts the phenotype, revealing loci that have apparently sustained  
508 cytosine methylation repatterning, and producing a phenotypic memory effect, presumably methylation-  
509 based, that is reproducible and heritable. If correct, the *msh1* memory phenomenon comprises a robust  
510 medium for addressing epiallelic stability.

511  
512 Identification of gene networks in both seed development and *msh1* memory was based on DNA  
513 methylation data analysis with the enhanced resolution of Methyl-IT. In the case of *msh1* memory, gene  
514 expression, phenotype and cross-species comparison served to confirm the identified networks. While  
515 early in the process, these outcomes argue compellingly for the feasibility of genome-wide methylome  
516 decoding of the gene space.

## 517 **Conclusions**

518 Methyl-IT is an alternative and complementary approach to plant methylome analysis that discriminates  
519 DNA methylation signal from background and enhances resolution. Analysis of publicly available  
520 methylome datasets showed enhanced signal during seed development and germination within genes  
521 belonging to related pathways, providing new evidence that DNA methylation changes occur within gene  
522 networks. Similarly, *msh1* transgenerational memory phenomena in *Arabidopsis* and tomato identified  
523 methylation-altered gene networks involving circadian clock components and linked stress response  
524 pathways altered in expression and connected to phenotype. Whereas, previous methylome analysis  
525 protocols identify changes in methylome density and landscape, predominantly non-CG, Methyl-IT  
526 reveals effects within gene space, mostly CG and CHG, for elucidation of methylome linkage to gene  
527 effects.

## 528 **Methods**

### 529 **Methylome analysis**

530 The alignment of BS-Seq sequence data from *Arabidopsis thaliana* was carried out with Bismark 0.15.0  
531 [46]. BS-Seq sequence data from tomato experiment were aligned using ERNE 2.1.1 [47]. The basic



532 theoretical aspects of methylation analysis applied in the current work are based on previous published  
533 results [9]. Details on Methyl-IT steps are provided in the next sections.

534

### 535 **Methylation level estimation**

536 To estimate methylation levels at each cytosine position, we followed a Bayesian approach. In a Bayesian  
537 framework assuming uniform priors, the methylation level  $p_i$  can be defined as:

538  $p_i = (n_i^{mC} + 1) / (n_i^{mC} + n_i^C + 2)$  (1), where  $n_i^{mC}$  and  $n_i^C$  represent the numbers of methylated and non-  
539 methylated read counts observed at the genomic coordinate  $i$ , respectively. We estimate the shape

540 parameters  $\alpha$  and  $\beta$  from the beta distribution  $P(p|\alpha, \beta) = \frac{p^{\alpha-1}(1-p)^{\beta-1}}{B(\alpha, \beta)}$  (2) minimizing the

541 difference between the empirical and theoretical cumulative distribution functions (ECDF and CDF,  
542 respectively), where  $B(\alpha, \beta)$  is the beta function with shape parameters  $\alpha$  and  $\beta$ . Since the beta

543 distribution is a prior conjugate of binomial distribution, we consider the  $p$  parameter (methylation level

544  $p_i$ ) in the binomial distribution as randomly drawn from a beta distribution. The hyper-parameters  $\alpha$  and

545  $\beta$  are interpreted as pseudo counts. Then, the mean  $E[p_i|D] = \hat{p}_i$  of methylation levels  $p_i$ , given the

546 data  $D$ , is expressed by  $\hat{p}_i = \frac{\alpha + n_i^{mC}}{\alpha + \beta + n_i^{mC} + n_i^C}$  (3). The methylation levels at the cytosine with genomic

547 coordinate  $i$  are estimated according to this equation.

548

### 549 **Hellinger and Total Variation divergences of the methylation levels**

550 The difference between methylation levels from reference and treatment experiments is expressed in

551 terms of information divergences of their corresponding methylation levels,  $\hat{p}_i^r$  and  $\hat{p}_i^t$ , respectively. The

552 reference sample(s) can be additional experiment(s) fixed at specific conditions, or a virtual sample

553 created by pooling methylation data from a set of control experiments, e.g. wild type individual or group.

554 Hellinger divergence between the methylation levels from reference and treatment experiments is  
555 defined as:

556 
$$H(\hat{p}_i^r, \hat{p}_i^t) = w_i \left[ \left( \sqrt{\hat{p}_i^r} - \sqrt{\hat{p}_i^t} \right)^2 + \left( \sqrt{1 - \hat{p}_i^r} - \sqrt{1 - \hat{p}_i^t} \right)^2 \right] \quad (4)$$

557 Where  $w_i = 2 \frac{m_i^t m_i^r}{m_i^t + m_i^r}$ ,  $m_i^t = n_i^{mC_t} + n_i^{C_t} + 1$  and  $m_i^r = n_i^{mC_r} + n_i^{C_r} + 1$ . The total variation of the  
 558 methylation levels  $TV(\hat{p}_i^r, \hat{p}_i^t) = \hat{p}_i^r - \hat{p}_i^t$  (5) indicates the direction of the methylation change in the  
 559 treatment, hypo-methylated  $TV < 0$  or hyper-methylated  $TV > 0$ .  $TV$  is linked to a basic information  
 560 divergence, the total variation distance, defined as:  $TVD(\hat{p}_i^r, \hat{p}_i^t) = |TV(\hat{p}_i^r, \hat{p}_i^t)|$  (6). Distance

561  $TVD(\hat{p}_i^r, \hat{p}_i^t)$  and Hellinger divergence hold the inequality:  $TVD(\hat{p}_i^r, \hat{p}_i^t) \leq \frac{2}{\sqrt{2w_i}} \sqrt{H(\hat{p}_i^r, \hat{p}_i^t)}$  (7)

562 [48]. Under the null hypothesis of non-difference between distributions  $\hat{p}_i^r$  and  $\hat{p}_i^t$ , Eq. 4 asymptotically  
 563 has a chi-square distribution with one degree of freedom. The term  $w_i$  introduces a useful correction for  
 564 the Hellinger divergence, since the estimation of  $\hat{p}_i^t$  and  $\hat{p}_i^r$  are based on counts (see Table 1).

565

#### 566 **Non-linear fit of Weibull distribution**

567 The cumulative distribution functions (CDF) for  $H_k(\hat{p}_k^r, \hat{p}_k^t)$  can be approached by a Weibull

568 distribution  $P(H_k \leq H^0 | \alpha, \lambda, \mu) = 1 - e^{-\left(\frac{H_k - \mu}{\lambda(t)}\right)^\alpha}$  (8) [9]. Parameter  $\hat{\alpha}$ ,  $\hat{\lambda}$  and  $\hat{\mu}$  were estimated by non-

569 linear regression analysis of the ECDF  $\hat{F}_n(\hat{H}_k \leq H^0)$  versus  $H_k(\hat{p}_k^r, \hat{p}_k^t)$  [9]. The ECDF of the variable

570  $\hat{H}_k$  is defined as:

$$571 \quad \hat{F}_n(\hat{H}_k \leq H^0) = \frac{\text{number of CDMs in the samples with } \hat{H}_k \leq H^0}{n} = \frac{1}{n} \sum_{k=1}^n 1_{\hat{H}_k \leq H^0} \quad (9)$$

572 , where  $1_{\hat{H}_k \leq H^0} = \begin{cases} 1 & \text{if } \hat{H}_k \leq H^0 \\ 0 & \text{if } \hat{H}_k > H^0 \end{cases}$  is the indicator function. Function  $\hat{F}_n(\hat{H}_k \leq H^0)$  is easily computed

573 (for example, by using function “*ecdf*” of the statistical computing program “R”[49]).

574

#### 575 **A statistical mechanics-based definition for a potential/putative methylation signal (PMS)**

576 Most methylation changes occurring within cells are likely induced by thermal fluctuations to ensure  
 577 thermal stability of the DNA molecule, conforming to laws of statistical mechanics [9]. These changes do

578 not constitute biological signals, but methylation background noise induced by thermal fluctuations, and  
579 must be discriminated from changes induced by the treatment. Let  $P(E_k^D \leq E_k^{D_0})$  be the probability that  
580 energy  $E_k^D$ , dissipated to create an observed divergence  $D$  between the methylation levels from two  
581 different samples at a given genomic position  $k$ , can be lesser than or equal to the amount of energy  $E_k^{D_0}$ .  
582 Then, a single genomic position  $k$  shall be called a PMS at a level of significance  $\alpha$  if, and only if, the  
583 probability  $P(E_k^D > E_k^{D_0}) = 1 - P(E_k^D \leq E_k^{D_0})$  to observe a methylation change with energy dissipation  
584 higher than  $E_k^{D_0}$  is lesser than  $\alpha$ . The probability  $P(E_k^D \leq E_k^{D_0})$  can be given by a member of the  
585 generalized gamma distribution family and, in most cases, experimental data can be fixed by the Weibull  
586 distribution [9]. Based on this dynamic nature of methylation, one cannot expect a genome-wide  
587 relationship between methylation and gene expression. A practical definition of PMS based on Hellinger  
588 divergence derives provided that  $H_k$  is proportional to  $E_k^H$  and using the estimated Weibull CDF for  
589  $H_k$  given by Eq. 8. That is, a single genomic position  $k$  shall be called a PMS at a level of significance  
590  $\alpha$  if, and only if, the probability  $\hat{P}(H_k > H^0 | \hat{\alpha}, \hat{\lambda}, \hat{\mu}) = 1 - \hat{P}(H_k \leq H^0 | \hat{\alpha}, \hat{\lambda}, \hat{\mu})$  to observe a  
591 methylation change with Hellinger divergence higher than  $H_k$  is lesser than  $\alpha$ .

592 The PMSs reflect cytosine methylation positions that undergo changes without discerning whether they  
593 represent biological signal created by the methylation regulatory machinery. The application of signal  
594 detection theory is required for robust discrimination of biological signal from physical noise-induced  
595 thermal fluctuations, permitting a high signal-to-noise ratio.

596

### 597 **Robust detection of differentially informative methylated positions (DIMPs)**

598 Application of signal detection theory is required to reach a high signal-to-noise ratio [50, 51]. To  
599 enhance DIMP detection, the set of PMSs is reduced to the subset of cytosines with

600  $TVD(\hat{p}_i^r, \hat{p}_i^t) \leq TVD_0$ , where  $TVD_0$  is a minimal total variation distance defined by the user, preferably

601  $TVD_0 > 0.1$ . If we are interested not only in DIMPs but also in the full spectrum of biological signals,

602 this constraint is not required. Once potential DIMPs are estimated in the treatment and in the control

603 samples, a logistic regression analysis is performed with the prior binary classification of DIMPs, i.e., in

604 terms of PMSs (from treatment versus control), and a receiver operating curve (ROC) is built to estimate

605 the cutpoint of the Hellinger divergence at which an observed methylation level represents a true DIMP.

606 There are several criteria to estimate the optimal cutpoint, many of which are implemented in the R  
607 package *OptimalCutpoints* [25]. The optimal cutpoint used in Methyl-IT corresponds to the  $H$  value that  
608 maximizes Sensitivity and Specificity simultaneously [52, 53]. These analyses were performed with the R  
609 package *Epi* [54].

610 Once all pairwise comparisons are done, a final decision of whether a DFMP is a DIMP is taken based on  
611 the highest cutpoint detected in the ROC analyses (Fig. 1). That is, the decision is taken based on the  
612 cutpoint estimated in the ROC analysis for the control sample with the closest distribution to treatment  
613 samples. The position of the cutpoint will determine a final posterior classification for which we would  
614 estimate the number of true positive, true negatives, false positives and false negatives. For each cutpoint  
615 we would estimate, the accuracy and the risk of our predictions. We may wish to use different cutpoints  
616 for different situations. For example, if our goal is the early detection of a terminal disease and high  
617 values of the target variable indicates that a patient carries the disease, then to save lives we would prefer  
618 the lowest meaningful cutpoint reducing the rate of false negative.

619

#### 620 ***Estimation of differentially methylated genes (DMGs) using Methyl-IT***

621 Our degree of confidence in whether DIMP counts in both control and treatment represent true biological  
622 signal was set out in the signal detection step. To estimate DMGs, we followed similar steps to those  
623 proposed in Bioconductor R package DESeq2 [55], but the test looks for statistical difference between the  
624 groups based on gene body DIMP counts rather than read counts. The regression analysis of the  
625 generalized linear model (GLMs) with logarithmic link was applied to test the difference between group  
626 counts. The fitting algorithmic approaches provided by *glm* and *glm.nb* functions from the R packages  
627 *stat* and MASS were used for Poisson (PR), Quasi-Poisson (QPR) and Negative Binomial (NBR) linear  
628 regression analyses, respectively.

629 Likewise for DESeq2 we used the linear regression model  $\log_2(q_{ij}) = \sum_k x_{jk} \beta_{ik}$ , with design matrix  
630 elements  $x_{jk}$ , coefficients  $\beta_{ik}$ , and mean  $\mu_{kj} = s_j q_{kj}$ , where  $s_j$  normalization constants are considered  
631 constant within a group. Only two groups were compared at a time. The design matrix elements indicate  
632 whether a sample  $j$  is treated or not, and the GLM fit returns coefficients indicating the overall  
633 methylation strength at the gene and the logarithm base 2 of the fold change ( $\log_2FC$ ) between treatment  
634 and control [55]. In particular, in the case of NBR, the inverse of the variance was used as prior weight

635  $(\sigma_{jk}^2 = \frac{1}{\mu_{ij} + \mu_{ij}disp})$ , where *disp* is data dispersion computed by the *estimateDispersions* function from

636 DESeq2 R package).

637 To test difference between group counts we applied the fitting algorithmic approaches: PR and PQR if

638  $\rho < \frac{\mu_{ij}}{\sigma_{ij}} \leq 1 (0.9 < \rho < 1)$ , NBR and NBR with ‘*prior weights*’. Next, best model based on Akaike

639 information criteria (AIC). The Wald test for significance of the independent variable coefficient indicates

640 whether or not the treatment effect is significant, while the coefficient sign (*log2FC*) will indicate the

641 direction of such an effect.

642

### 643 **Bootstrap goodness-of-fit test for 2x2 contingency tables**

644 The goodness-of-fit RMST 2x2 contingency tables as implemented in methylpy [17] for the estimation of

645 DMSs (based on the root-mean-square (RMS) statistics) is explained in Perkins et al. in reference [26](a

646 complementary description is found at arXiv:1108.4126v2). The bootstrap heuristic to perform the test is

647 given in reference [56]. An analogous bootstrap goodness-of-fit test based on Hellinger divergence was

648 also applied to estimate DMPs (HDT). In this case, Hellinger divergence estimated according to the first

649 statistic given in Theorem 1 from reference [27].

650

### 651 **Identification of differentially methylated regions by using BiSeq, DSS and MethyPy**

652 For BiSeq, raw sequence reads were trimmed to remove both poor-quality calls and adapters using Trim

653 galore! (version 0.4.1) with options --paired --trim1 --gzip --phred33 --fastqc and Cutadapt (version 1.9.1)

654 with cutoff 20. Remaining sequences were mapped to the Arabidopsis TAIR10 genome using Bismark

655 (version v0.15.0) [46] and Bowtie2 (Version 2.2.9) [57]. Duplicates were removed using the Bismark

656 deduplicate function, and methylation calls were extracted with Bismark methylation extractor, reading

657 methylation calls of overlapping parts of the paired reads from the first read (–no\_overlap parameter).

658 Differentially methylated regions were detected with BiSeq (version 1.18.0) [16, 58] with clusters at least

659 15 methylated sites with 100 bp between clusters.

660

661 For DSS, raw sequence reads were trimmed to remove both poor-quality calls and adapters using Trim

662 galore! (version 0.4.1) with options --paired --trim1 --gzip --phred33 --fastqc and cutadapt (version 1.9.1)

663 with cutoff 20. Remaining sequences were mapped to the Arabidopsis TAIR10 genome using Bismark

664 (version v0.15.0) [46] and Bowtie2 (Version 2.2.9)[57]. Duplicates were removed using the Bismark  
665 deduplicate function and methylation calls were extracted with Bismark methylation extractor, reading  
666 methylation calls of overlapping parts of the paired reads from the first read (`--no_overlap` parameter).  
667 Differentially methylated regions were detected with DSS (Dispersion shrinkage for sequencing data,  
668 version 2.26.0) using the default parameters.

669  
670 For MethylPy, differentially methylated regions (DMR) were identified using the MethylPy pipeline  
671 (version v0.1.0) [17] and Bowtie2 (Version 2.3.3)[57]. This pipeline used Cutadapt (version  $\geq 1.9$ ) to  
672 trim the raw sequence reads to remove both poor-quality calls and adapters. Picard ( $\geq 2.10.8$ ) was used  
673 for PCR duplicate removal. Chloroplast DNA sequence was used as the unmethylated control; the  
674 conversion rate observed was between 0.3% - 0.4%. Cytosine sites with less than four reads were  
675 discarded. Adjacent differential methylated sites closer to 100bp were collapsed into DMRs. CNN DMRs,  
676 CGN DMRs, CHG DMRs, and CHH DMRs with fewer than four, eight, four, and four DMSs,  
677 respectively, were discarded in following analyses, and CNN DMRs, CGN DMRs, CHG DMRs, and  
678 CHH DMR candidate regions with less than 0.1, 0.4, 0.2, and 0.1 differences between maximum and  
679 minimum methylation levels were also discarded.

680  
681 For Methyl-IT, raw sequence reads were trimmed to remove both poor-quality calls and adapters using  
682 Trim galore! (version 0.4.1) with options `--paired --trim1 --gzip --phred33 --fastqc` and Cutadapt (version  
683 1.9.1) with cutoff 20. Remaining sequences were mapped to the Arabidopsis TAIR10 genome using  
684 Bismark (version v0.15.0) [46]; and Bowtie2 (Version 2.2.9) [57]. Duplicates were removed using the  
685 Bismark deduplicate function and methylation calls were extracted with Bismark methylation extractor,  
686 reading methylation calls of overlapping parts of the paired reads from the first read (`--no_overlap`  
687 parameter). Differentially methylated regions were detected with Methyl-IT, using cytosine sites with at  
688 least 4 reads, and with default parameters.

689  
690 Since methods DSS, BiSeq and Methylpy do not provide an equivalent concept to DMGs, we adopted the  
691 concept of *DMR associated genes* (DAGs) introduced in reference [18]. Basically, *a gene and a DMR are*  
692 *associated if the DMR is located within 2 kb of gene upstream regions, gene bodies and 2 kb of gene*  
693 *downstream regions* [18].

694

695 **Available methylome datasets used in this work**

696 Methylome datasets from Arabidopsis (Ws-0) major seed developmental phases, globular stage (GLOB),  
697 linear cotyledon stage (COT), mature green stage (MG), post mature green stage (PMG) and dry seed,  
698 and Arabidopsis (Col-0) germination datasets of dry seed and 0-4 days after imbibition were analyzed.  
699 Ws-0 seed development and germination datasets were obtained from the Gene Expression Omnibus  
700 (GEO) under accession numbers GSE68132 and GSE94710. Both dataset were original studied by  
701 Kawakatsu et al. (2017) [18].  
702

703 **Network enrichment analysis**

704 Network based enrichment analysis (NBEA) was applied using the EnrichmentBrowser R package [59,  
705 60] and the Network Enrichment Analysis Test (NEAT) was performed by using the R package "neat"  
706 version 1.1.1[60].

707 These network enrichment approaches permitted identification of main network regulators involved in the  
708 *msh1* memory transgenerational effect and in seed developmental and germination datasets.

709

710 **Individual sample gene CG methylation principal component analysis (PCA) and**  
711 **classification**

712 Individual samples were represented as vectors of variables carrying the mean of CG Hellinger  
713 divergence covering gene regions delimited by Arabidopsis *msh1*-memory DMGs. Principal component  
714 analysis (PCA) was performed on the individual vector-spaces determined by the gene regions: 1) DMGs ,  
715 2) intersection DEGs (*msh1*-memory)/DMGs, and 3) intersection NBEA-DMG/NBEA-DEG between the  
716 subsets derived from independent NBEA on the subsets DMGs and DEGs, respectively. PCA and  
717 hierarchical cluster analysis were applied by using *prcomp* and *hclust* functions, respectively, from the R  
718 package *stats*.

719

720 **Specific locus bisulfite sequencing PCR**

721 To confirm our analysis for DIMP calling based on methylome sequencing, PCR-based bisulfite  
722 sequencing was performed. Genomic DNA from leaf tissue of 4-week-old plants was isolated by the  
723 DNeasy Plant Kit (Qiagen, Germany). 400 ng of genomic DNA was bisulfite-treated using EpiMark  
724 Bisulfite Conversion Kit (New England Biolabs, USA). Bisulfite-treated DNA was used as template for  
725 PCR in a 25 ul reaction system by using EpiMark Hot Start Taq DNA Polymerase (New England Biolabs,

726 USA), in the PCR program: Initial denaturation 30 sec at 95 °C, 40 cycles of 95°C for 15 sec ,45°C for 30  
727 sec, 68°C for 1 min, and final extension 5 min at 68 °C. PCR product was gel-purified using kit (Qiagen,  
728 Germany) and ligated to TOPO TA cloning kit (Life, USA) for sequencing. At least 25 independent  
729 clones were sequenced. Bisulfite DNA sequence methylation status was analyzed by the online program  
730 “Kismeth”. Methylation at locus AT5G66750 was used as a control for bisulfite conversion. Primers used  
731 in this experiment are listed in the Additional file 14 Table S13.

732

### 733 **Plant materials and growth conditions**

734 For Arabidopsis plants used in this study, clean seeds were sown on peat mix in square pots, with  
735 stratification at 4 °C for 2 days before moving to growth chamber (22 °C, 120-150  $\mu$  mol·m<sup>-2</sup>·s<sup>-1</sup> light).  
736 Tomato seeds were germinated on MetroMix 200 medium (SunGro, USA) in square pots and grown in a  
737 reach-in chamber (26 °C, 300  $\mu$  mol·m<sup>-2</sup>·s<sup>-1</sup> light).

738

### 739 **5-azacytidine treatment**

740 The 5-azacytidine treatment protocol was adopted from Griffin et al [57] and Yang et al [30]. Col-0 wild  
741 type and *msh1* memory line seeds were surface-sterilized in 10% (v/v) sodium hypochlorite, rinsed  
742 thoroughly with sterile water, and sown in 8-oz clear cups (Fabri-Kal, USA) containing 30 mL 0.5 M  
743 Murashige and Skoog medium (Sigma, USA) supplemented with 1% (w/v) agar and 0 (control) or 100  
744  $\mu$ M 5-azacytidine (Sigma, USA). The 100  $\mu$ M concentration was derived from a concentration gradient  
745 experiment of 4 concentrations (0  $\mu$ M, 30  $\mu$ M ,50  $\mu$ M ,100  $\mu$ M) where 100  $\mu$ M showed visible impact on  
746 plant growth for both wild type Col-0 and *msh1* memory line plants. Seeds were germinated and grown at  
747 24°C, 18-h day length, and 120-150  $\mu$  mol·m<sup>-2</sup>·s<sup>-1</sup> light intensity for 14 days. 10 days old seedling on the  
748 MS medium were collected for RNAseq experiment. For longer observation, the treated plants were  
749 transferred to square pots with soil and grow under standard conditions in the growth chamber. The  
750 experiment was repeated three times, with at least 18 replicates per treatment each experiment.

751

### 752 **Sample collection for circadian clock gene expression assays**

753 To assess the expression pattern of core circadian clock genes under clock-driven free running conditions,  
754 we adopted the protocol of [38]. Plants were entrained at LD condition (12 hr light/ 12 hr dark) for 4  
755 weeks, then moved to LL (24 hr constant light) for 48 hours before sample collection was initiated.



756 For expression of core circadian clock genes under life-like conditions, plants were entrained at LD (12 hr  
757 light/12 hr dark) for 4 weeks before samples were collected. The entire above-ground plant was collected  
758 and placed into liquid nitrogen. Samples were taken every 4 hr (ZT6, ZT10, ZT14, ZT18, ZT22,  
759 ZT26, ZT30, ZT34, ZT38, ZT42, ZT46, ZT50) in both LD and LL conditions. For each genotype at each  
760 time point, at least 3 plants were collected and used in qPCR experiments as biological replicates.  
761 An identical sample collection strategy, and LD, LL entrainment conditions, were used for tomato  
762 circadian clock gene expression experiments.

763

#### 764 **Gene Expression Analysis by qPCR**

765 The MIQE [61] was used as standard protocol for the qPCR experiments. Briefly, total RNA from each  
766 sample was extracted by NucleoSpin RNA Plant kit (Macherey-Nagel, Germany) following  
767 manufacturer's protocol, including genomic DNA removal. First-strand cDNA was synthesized from  
768 400ng total RNA with oligo primers using iScript Reverse Transcription Supermix for RT-PCR (Bio-Rad,  
769 USA). The qPCR was performed on the CFX real-time system (Bio-Rad, USA) with 95 °C for 3 min, 40  
770 cycles of 95 °C for 30 sec and 60 °C for 1 min. Three biological replicates were performed. RNA  
771 abundance of target genes was calculated from the average of four technical replicates using  $\Delta \Delta Cq$   
772 method, where  $Cq$  is the cycle number at which amplification signal reaches saturation in each PCR run.  
773 The  $Cq$  values of AT4G05320 and AT5G15710 were used as normalization controls in the calculation.

774

775 Real-time PCR primers used in this study and their reference are listed in Supplemental Primers Table.  
776 The PCR amplification efficiency was calculated based on a calibration standard curve specific for each  
777 primer set, and only primers having amplification efficiency greater than 0.97 were used in the study.

778

#### 779 **Sample preparation and bisulfite DNA methylome sequencing**

780 For Arabidopsis genome-wide bisulfite methylome sequencing experiments, three individual plants of  
781 wild type *Arabidopsis thaliana* ecotype Col-0 and three isogenic *msh1* memory line plants were used. All  
782 wild type control plants selected from negative events of RNAi transformation and were maintained in  
783 parallel with their *msh1* memory counterparts. Whole plants at early bolting were flash frozen in liquid  
784 nitrogen. Tissues were ground by motor and pestle in liquid nitrogen, and divided to two, with one half  
785 processed by DNeasy Plant Kit (Qiagen, Germany) for genomic DNA (RNA removed) and subsequent  
786 bisulfite sequencing. The other half was used for RNA extraction by NucleoSpin RNA Plant Kit  
787 (Macherey-Nagel, Germany) following manufacturer's protocol, including genomic DNA removal, for  
788 RNA-seq analysis.

789  
790 For tomato bisulfite sequencing, wild type tomato (*Solanum lycopersicum* cv Rutgers) and the  
791 corresponding MSH1-RNAi transgene-null segregant (*msh1* memory line) were used. Phenotype and line  
792 generation details can be found in [30]. The top three leaves from each four-week-old tomato plant were  
793 collected and frozen in liquid nitrogen, followed by genomic DNA extraction using DNeasy Plant Kit  
794 (Qiagen, Germany). Genomic DNA from three individual plants for both WT and *msh1* memory line  
795 were used for BSseq.

796  
797 All BSseq experiments were conducted on the Hiseq 4000 analyzer (Illumina, USA) at BGI-Tech  
798 (Shenzhen, China) according to manufacturer's instructions. Briefly, Genomic DNA was sonicated to  
799 100-300 bp fragments and purified with MiniElute PCR Purification Kit (Qiagen, Germany), and  
800 incubated at 20°C after adding End Repair Mix. DNA was purified, a single 'A' nucleotide added to the 3'  
801 ends of blunt fragments, purified again and Methylated Adapter was added to 5' and 3' ends of each  
802 fragment. Fragments of 300-400 bp size range were purified with QIAquick Gel Extraction Kit (Qiagen,  
803 Germany) and subjected to bisulfite treatment by Methylation-Gold Kit (ZYMO). These steps were  
804 followed by PCR and gel purification (350-400 bp fragments were selected). Qualified libraries were  
805 paired-end sequenced on the HiSeq X-ten system.

806

### 807 **RNA sequencing and analysis**

808 RNA libraries were constructed as described in the TruSeq RNA Sample Preparation v2 Guide. These  
809 libraries were sequenced with the 150-bp reads option, in Hi-Seq 4000 analyzer (Illumina, USA) at BGI-  
810 Tech (Shenzhen, China). Alignments were performed using RUM 2.0.4 (default parameters) [62] keeping  
811 only uniquely mapped reads. The read count data were generated from the SAM files by using QoRTs  
812 software package[63]. DESeq2 [55] was used for gene count normalization and to identify differentially  
813 expressed genes (FDR < 0.05,  $|\log_2FC| > 0.5$ ).

814

### 815 **Abbreviations**

816 **AUC:** Area under the receiver operating characteristic curve

817 **MSH1:** MUTS HOMOLOG 1

818 **CDM:** Cytosine DNA methylation

819 **DAGs:** DMR associated genes

820 **DEG:** Differentially expressed gene

821 **DIMPs:** Differentially informative methylated positions

822 **DMGs:** Differentially methylated genes

823 **DMPs:** Differentially methylated positions

824 **DMRs:** differentially methylated regions

825 **DSS:** Dispersion Shrinkage for Sequencing

826 **FET:** Fisher's exact test

827 **GLM:** generalized linear regression model

828 **HD:** Hellinger divergence

829 **HDT:** goodness-of-fit test based on Hellinger divergence

830 **NEAT:** Network Enrichment Analysis Test

831 **NBEA:** Network based enrichment analysis

832 **RMST:** Root-mean-square test

833 **ROC:** Receiver operating characteristic curve

834 **SD:** Signal detection

835 **TVD:** total variation distance

836 **PMS:** Potential/putative methylation signal

### 837 **Acknowledgments**

838 We thank Ojus Jain and Kasim Hamo for technical assistance. We also thank Dr. Yingzhi Xu for valuable  
839 conversations early in the study. The data presented in this manuscript are tabulated in the main text and  
840 supplementary materials.

### 841 **Funding**

842 The work was supported by funding from NSF-SBIR (2015-33610-23428-UNL) and the Bill and Melinda  
843 Gates Foundation (OPP1088661).

### 844 **Availability of data and materials**

845 The Methyl-IT pipeline source code is available at the GitLab: <https://git.psu.edu/genomath/MethylIT>  
846 Seed development methylome data (accession number GSE68132) were obtained from the Gene  
847 Expression Omnibus database.

848 All Next Generation Sequencing data generated by this study are deposited to Gene Expression Omnibus  
849 database under accession numbers listed:

850 Arabidopsis methylome (GSE106309, Secure token for reviewers: epkxcgcelpcbpon), Arabidopsis *msh1*  
851 memory 4 week old plant RNAseq (GSE106536, Secure token for reviewers khezyogstbuvryj) ,

852 Arabidopsis 10 days old seedling 5-azacytidine treatment RNAseq (GSE109164, Secure token for  
853 reviewers: gfyfgucdfqhlal) , Tomato methylome (GSE105008, Secure token for reviewers: ebglsioentetrif).  
854

### 855 **Authors' contributions**

856 R.S. developed the application of the information thermodynamic theory on cytosine DNA methylation  
857 and conducted mathematical and computational biology analyses, XY, HK and YW designed and  
858 conducted biological experiments, JRB conducted computation. SM designed experiments, participated in  
859 data analysis and wrote manuscript.

860

### 861 **Competing interests**

862 S. Mackenzie has served as co-founder for a company that tests the MSH1 system for possible  
863 agricultural commercial value.

864

### 865 **Consent for publication**

866 Not applicable

867

### 868 **Ethics approval and consent to participate**

869 Not applicable

870

871

872 **Figures**

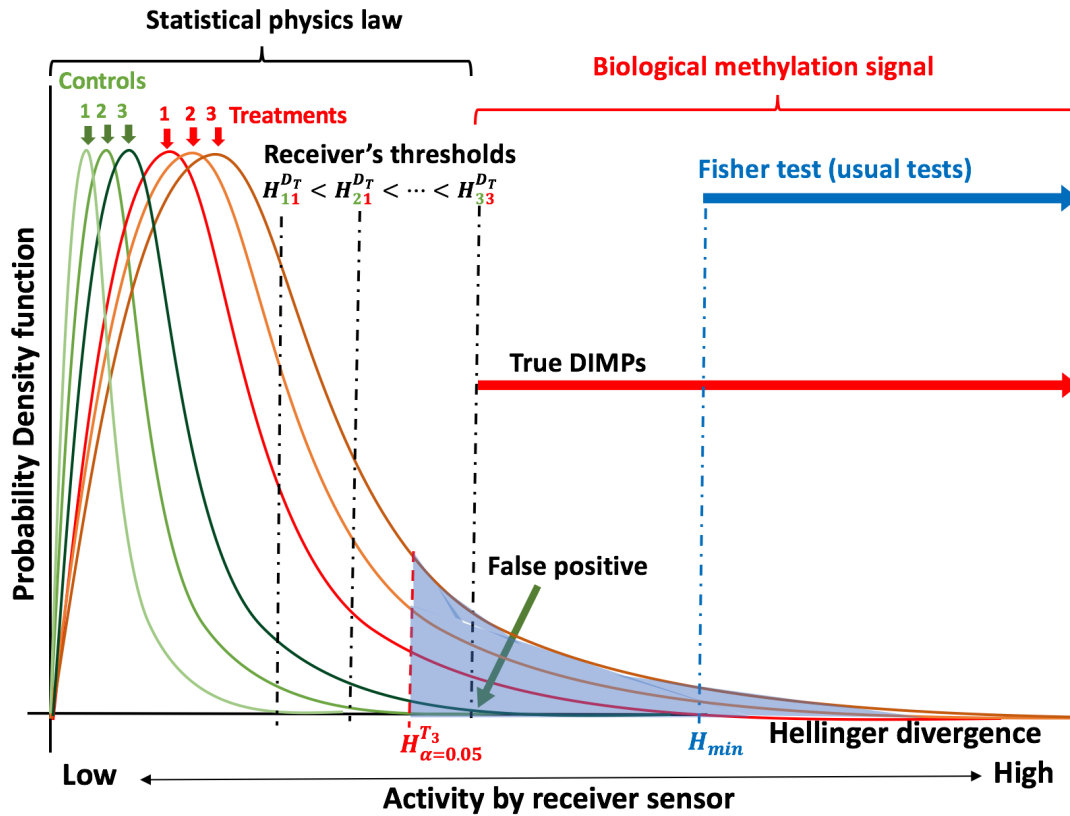

873

874 **Fig. 1** Diagrammatic representation of the theoretical principle behind Methyl-IT. Methyl-IT is designed  
 875 to identify a statistically significant cutoff between thermal system noise (conforming to laws of statistical  
 876 physics) and treatment signal (biological methylation signal), based on Hellinger divergence (H), to  
 877 identify “true” differentially informative methylation positions (DIMPs). Empirical comparisons allow  
 878 the placement of Fisher’s exact test for discrimination of DMPs.

879

880

881

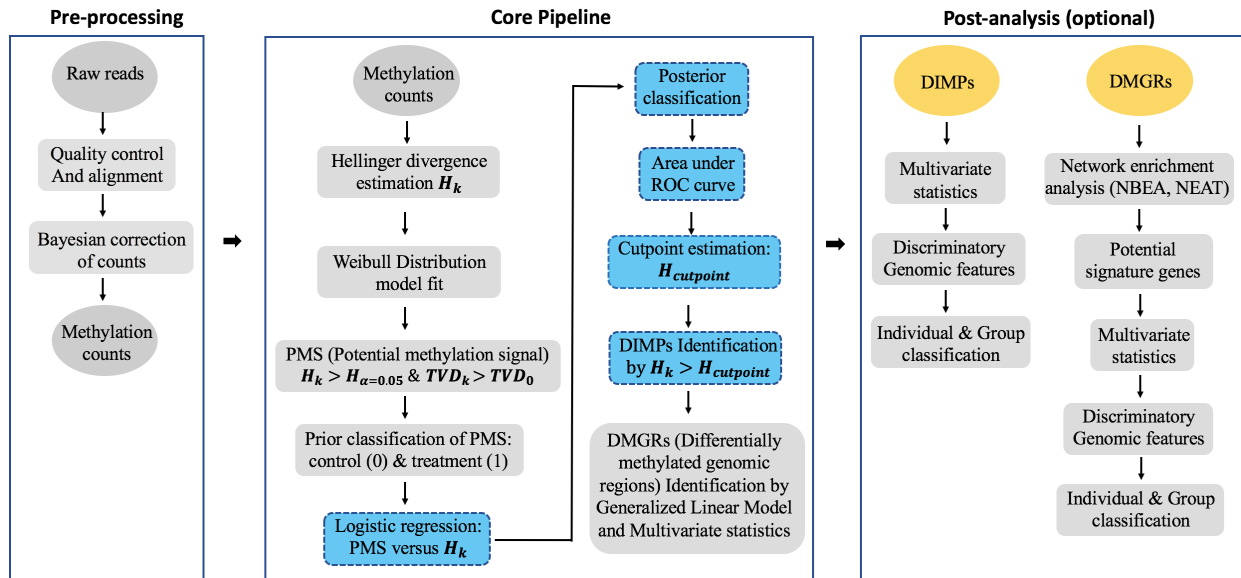

882

883 **Fig. 2** Methyl-IT processing flowchart. Ovals represent input and output data, squares represent  
 884 processing steps, with signal detection processing steps highlighted in blue and DIMPs and DMGRs, as  
 885 main outputs of Methyl-IT, highlighted in yellow. The generalized linear model is incorporated for group  
 886 comparison of genomic regions (GRs) based on the number of DIMPs in the treatment group relative to  
 887 control group. DIMPs and DMGRs can be subjected to further statistical analyses to perform network  
 888 enrichment analysis and to identify potential signature genes, multivariate statistical analysis (and  
 889 machine learning applications) for individual and group classifications.

890

891

892

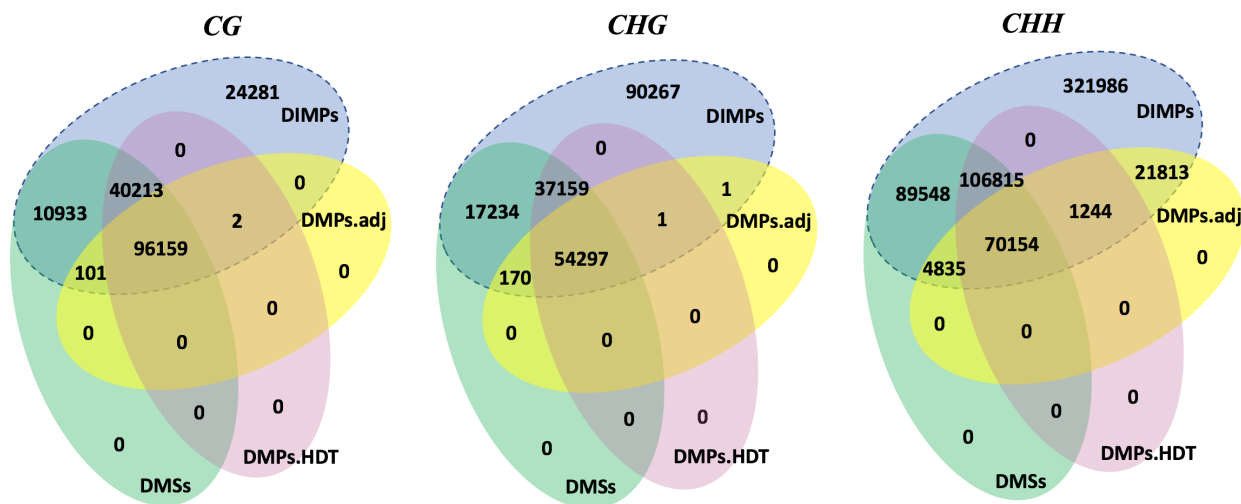

893

894 **Fig. 3** Venn diagrams of overlapping DMSs (RMST implemented in Methylpy software), DMPs.adj  
 895 (obtained with Fisher Exact Test), DMPs (DMPs.HDT, obtained with HDT, see methods) and DIMPs  
 896 (obtained with Methyl-IT) in the memory line. Only methylated cytosine positions with total variation  
 897 distance (TVD) greater than 0.23 (23% of methylation level difference) are shown for the three  
 898 methylation contexts. Only DIMPs carry methylation signal (region within the dashed oval). Notice that  
 899 any DMPs and DMSs outside the dashed oval (if any would be found in a different dataset or for TVD <  
 900 0.23) follow a Weibull distribution on a statistical mechanical basis as described in Fig.1. In such a case,  
 901 with high probability, these DMPs and DMSs correspond to “background” methylation patterning and do  
 902 not correspond to signal. This background effects can be discriminated by application of a signal  
 903 detection step against a specific control (in this case, wild type Col-0 under the same experimental  
 904 conditions).

905  
 906

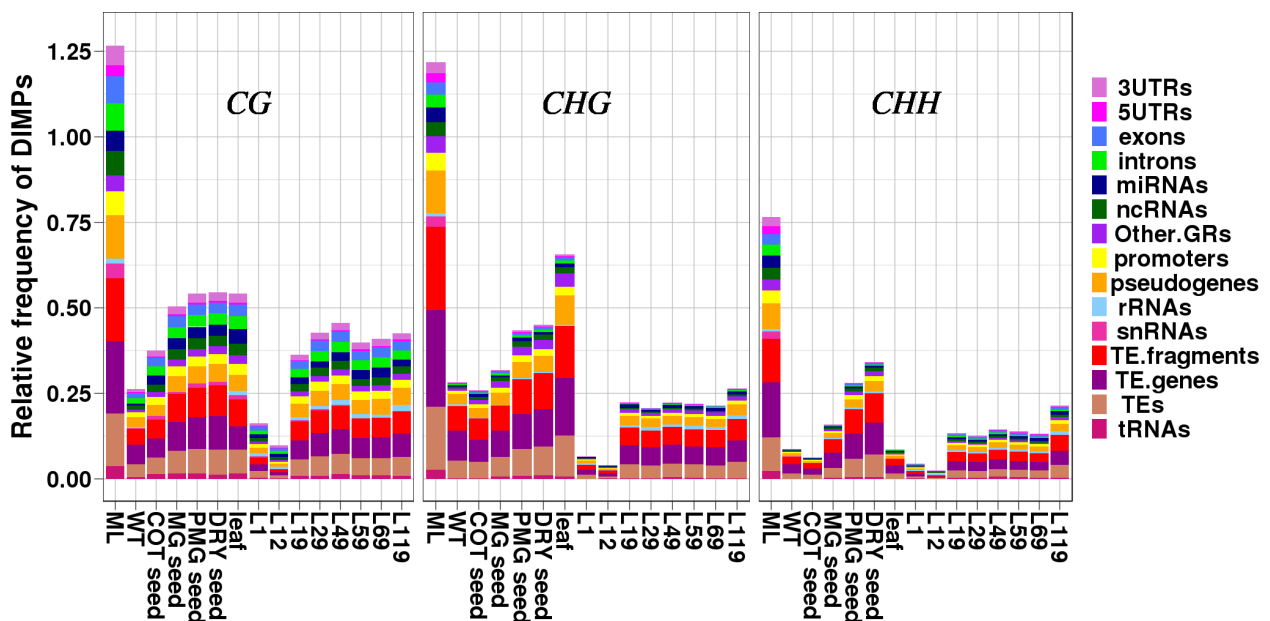

907  
 908 **Fig. 4** Results of signal detection with Methyl-IT for genome-wide methylome data from the *msh1*-  
 909 memory line (ML), a Col-0 wildtype pool (WT), seed development data from Kawakatsu et al [18] at five  
 910 seed stages (GLOB, COT, MG, PMG, DRY) and leaf (globular (GLOB) stage used as control), and  
 911 various Col-0 generational lineage samples (L1-L119) taken from Becker et al [3]. The experimental  
 912 results provide a direct, scaled comparison of methylation signal between datasets. The relative frequency  
 913 of DIMPs was estimated as the number of DIMPs divided by the number of cytosine positions.

914  
 915

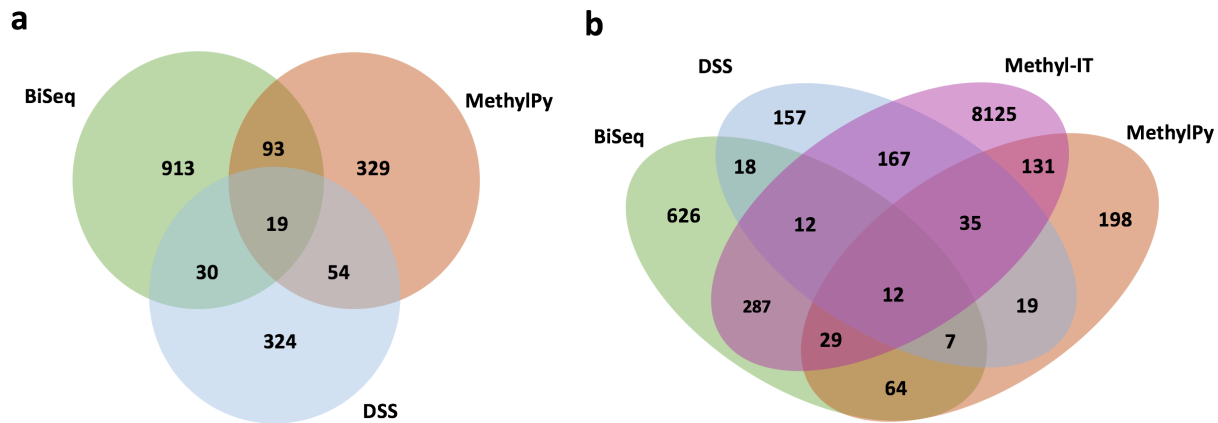

916

917

918 **Fig. 5** Comparison of DMR associated genes identified by DSS, BiSeq, MethylPy and DMGs predicted  
919 by Methyl-IT for *msh1* memory dataset. **(a)** Venn Diagram showing a comparison of DMR associated  
920 genes (DAGs) identified with the three methylome analysis programs DSS, BiSeq and MethylPy. **(b)**  
921 Venn Diagram showing a comparison of differentially methylated genes (DMGs) identified with Methyl-  
922 IT and the DAGs with the methylome analysis programs DSS, BiSeq, MethylPy. DMGs for gene regions  
923 plus 2kb upstream and downstream are shown, and only DIMPs with  $TVD > 0.15$  were counted for DMG  
924 estimations.

925

926



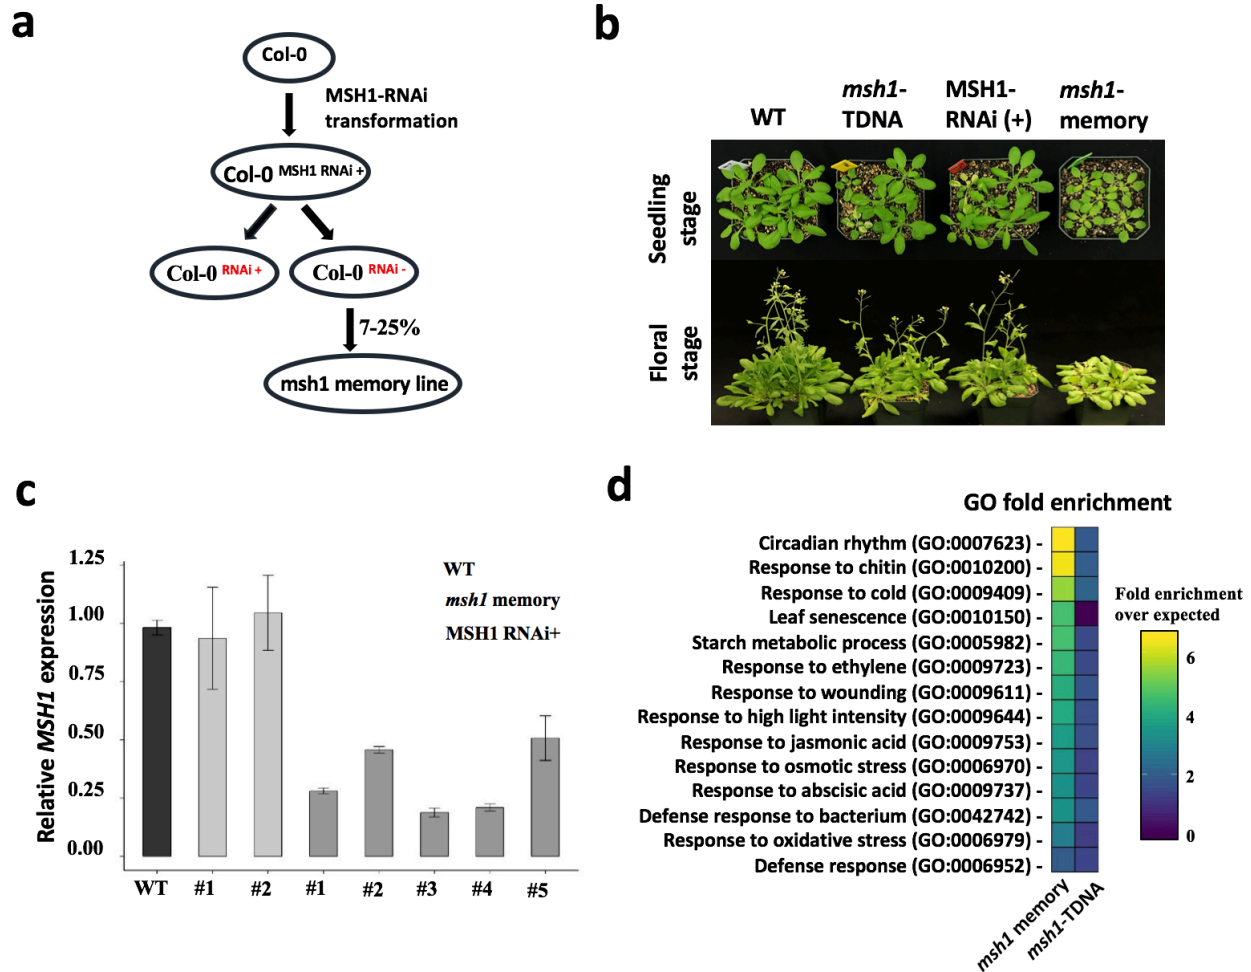

927

928 **Fig. 6** *MSH1* disruption produces transgenerational memory. (a) Pedigree of *msh1* memory line. (b)  
 929 Phenotypic range in different types of *MSH1*-derived development reprogramming, with *msh1* memory  
 930 plants uniformly reduced in growth rate, delayed flowering and pale leaves. Seedling stage photo at 4  
 931 weeks and floral stage at 6 weeks. (c) *MSH1* expression levels in *msh1* memory and *MSH1*- RNAi line.  
 932 Each column represents one individual plant, error bars represent  $\pm$  SD of 9 technical replicates. (d)  
 933 Functional enrichment analysis of differentially expressed genes in *msh1* memory line and *msh1* T-DNA  
 934 mutant. GO enrichment categories (above cutoff FDR<0.01) are shown.

935

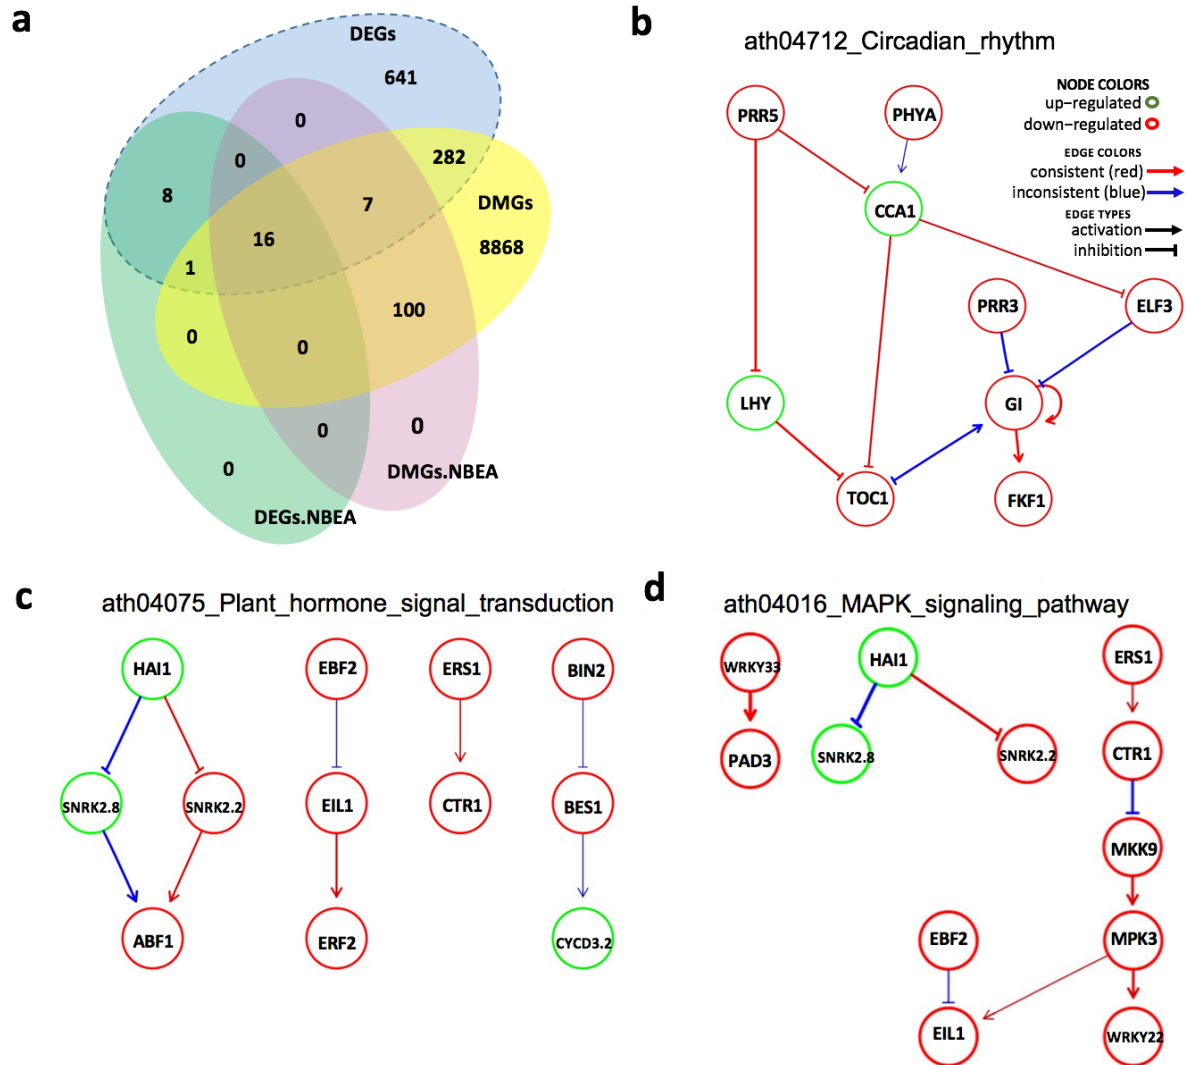

936

937

938 **Fig. 7** Application of network-based enrichment analysis (NBEA) on Methyl-IT-based differentially  
 939 methylated genes (DMGs) identifies signature pathways associated with *msh1* memory phenotype. (a)

940 Venn diagram showing intersection between independent assays of *msh1* memory-associated gene

941 expression and methylation changes. The main intersection from DMGs and DEGs datasets, and their

942 corresponding result with the application of NBEA, identified 16 putative regulatory loci. (b-d) Examples

943 of identified regulatory genes and the network in which they participate. The expression change (up,

944 green or down, red) is indicated, as well as the inconsistent change trends, marked as blue lines.

945

946

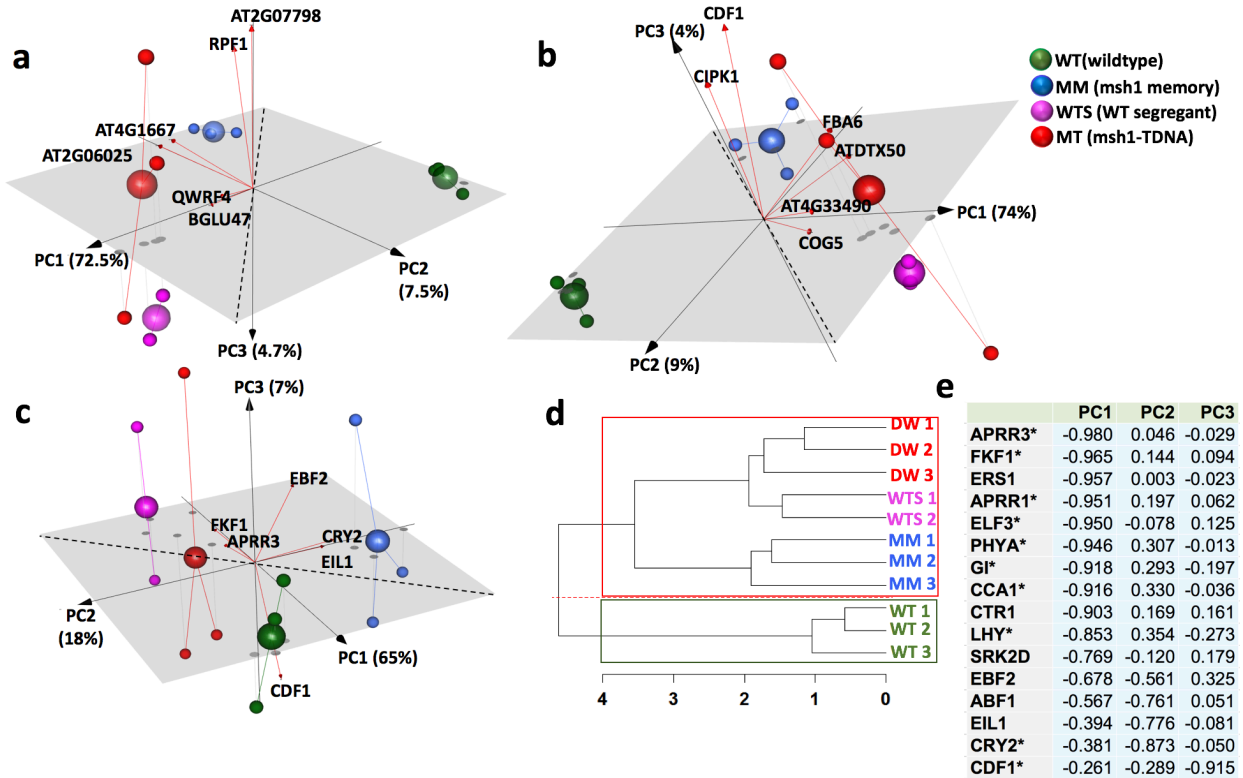

947  
 948 **Fig. 8** Principal component analysis (PCA) and classification of individual samples based on genic CG  
 949 methylation identifies primary contributors to the memory effect. (a) A three-dimensional representation  
 950 of PCA outcomes with the set of all differentially methylated genes (DMGs). Samples are color-coded;  
 951 “wild type segregant” (WTS) represents a wild type plant derived from crossing of the *msh1* T-DNA  
 952 mutant with wild type Col-0, while “wild type” (WT) represents Col-0. The centroid from each group is  
 953 represented by a large sphere connected by straight lines to smaller ones representing individual groups.  
 954 Red arrows represent the magnitude and direction of the contributions to each PC by the first two genes  
 955 with the greatest loadings. The square of the loadings reveals the proportion of variance of one variable  
 956 explained by one principal component, while its sign gives the direction of gene contribution to a given  
 957 component. (b) PCA performed at the intersection of DEGs and DMGs. (c) PCA performed at the  
 958 intersection of the DMG and DEG subsets derived from independent network-based enrichment analyses  
 959 (NBEA-DMG/NBEA-DEG) (see Fig. 7). These are genes involved in regulatory pathways. Since the two  
 960 first PCs carry most of the total explained variance, panels A, B, and C, suggest that the weight of the  
 961 sample classification rests on the planes defined by PC1 and PC2 (PC1-PC2), as observed in the  
 962 projections of the spheres (shadows) on these planes. A straight-line can be drawn on the planes PC1-PC2  
 963 (black dashed-line) to clearly classify the samples into two groups, wild type versus *msh1* effect (WTS,  
 964 DW, and MM). Thus, there is a discriminant function or a support vector to accomplish the classification.  
 965 (d) Hierarchical clustering with individual PC coordinates from the PCA on the intersection subset

966 NBEA-DMG/NBEA-DEG. (e) Correlation of genes from the subset NBEA-DMG/NBEA-DEG with the  
 967 first three principal components. All the genes reported in (e) carry a negative contribution to PC1 (which  
 968 carries a total explained variance of about 65%). The effect of these genes significantly separates the  
 969 *msh1* effect (DW, WTS, and ML) from the wildtype control (WT). Asterisks indicate genes included in  
 970 the list of 16 signatures for *msh1* memory.  
 971  
 972  
 973

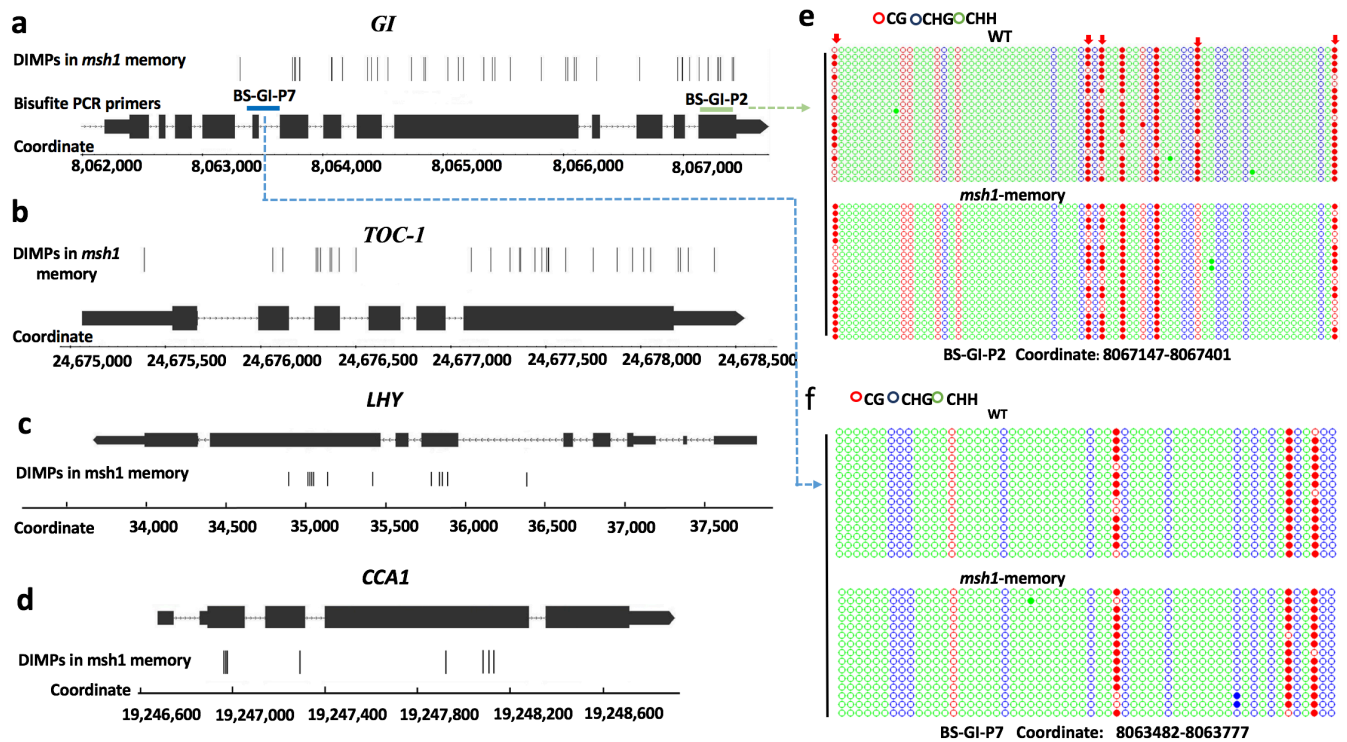

974  
 975 **Fig. 9** Altered methylation was assayed at circadian clock loci. DIMP calling by Methyl-IT (only CG  
 976 shown) in the *msh1* memory line at *GI* (a), *TOC-1*(b), *LHY*(c) and *CCA1*(d) regions is represented by  
 977 black vertical bars. The gene structure and coordinates were adopted from TAIR10, with thickest bar for  
 978 exons, medium bar for UTRs, and dotted line for introns. DIMP calling was further confirmed by specific  
 979 bisulfite-PCR sequencing. The green bar represents the amplification interval designed to detect DIMPs  
 980 within the *GI* gene, and the blue bar represent the interval used as negative control (no DIMPs predicted).  
 981 The PCR result is presented in (e) for primer set BS-GI-P2 and (f) for primer set BS-GI-P7. Dot-plot  
 982 analysis was applied to bisulfite sequencing result. Red, blue, and green circles represent CG, CHG and  
 983 CHH respectively (methylation solid, no methylation blank). Each line represents one clone sequenced,  
 984 and at least 15 clones were sequenced for each PCR reaction.  
 985

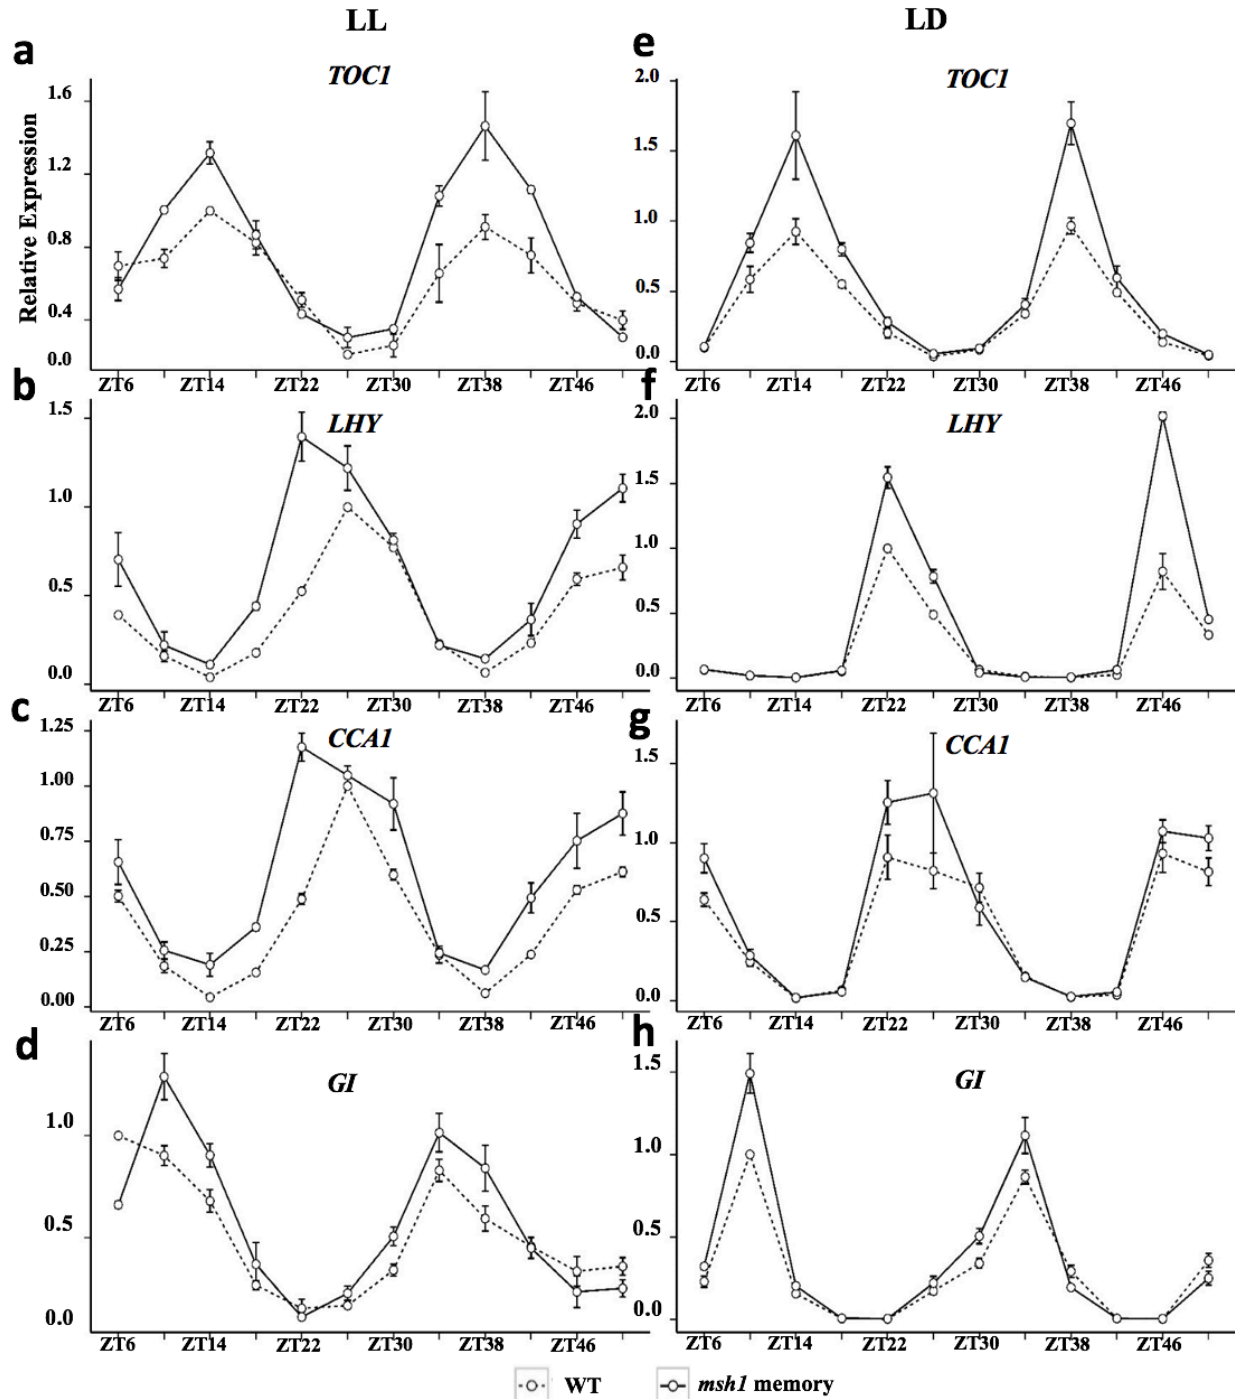

986

987 **Fig. 10** Test of altered circadian behavior in the Arabidopsis *msh1* memory line. Relative transcript levels  
 988 of indicated genes in wild type (dashed line) and *msh1* memory (solid line) grown under LL (24 hours  
 989 light) following entrainment for 4 weeks under LD (12 hours light,12 hours dark) (a, b, c, d) or retained  
 990 under LD (e, f, g, h). Zeitgeber time (ZT) indicates the sampling time (with ZT0 when light starts).  
 991 Transcript levels were measured by qPCR, and expression levels were normalized to the highest peak of  
 992 WT control. Error bars represent mean  $\pm$  SD of three independent biological replicates.

993

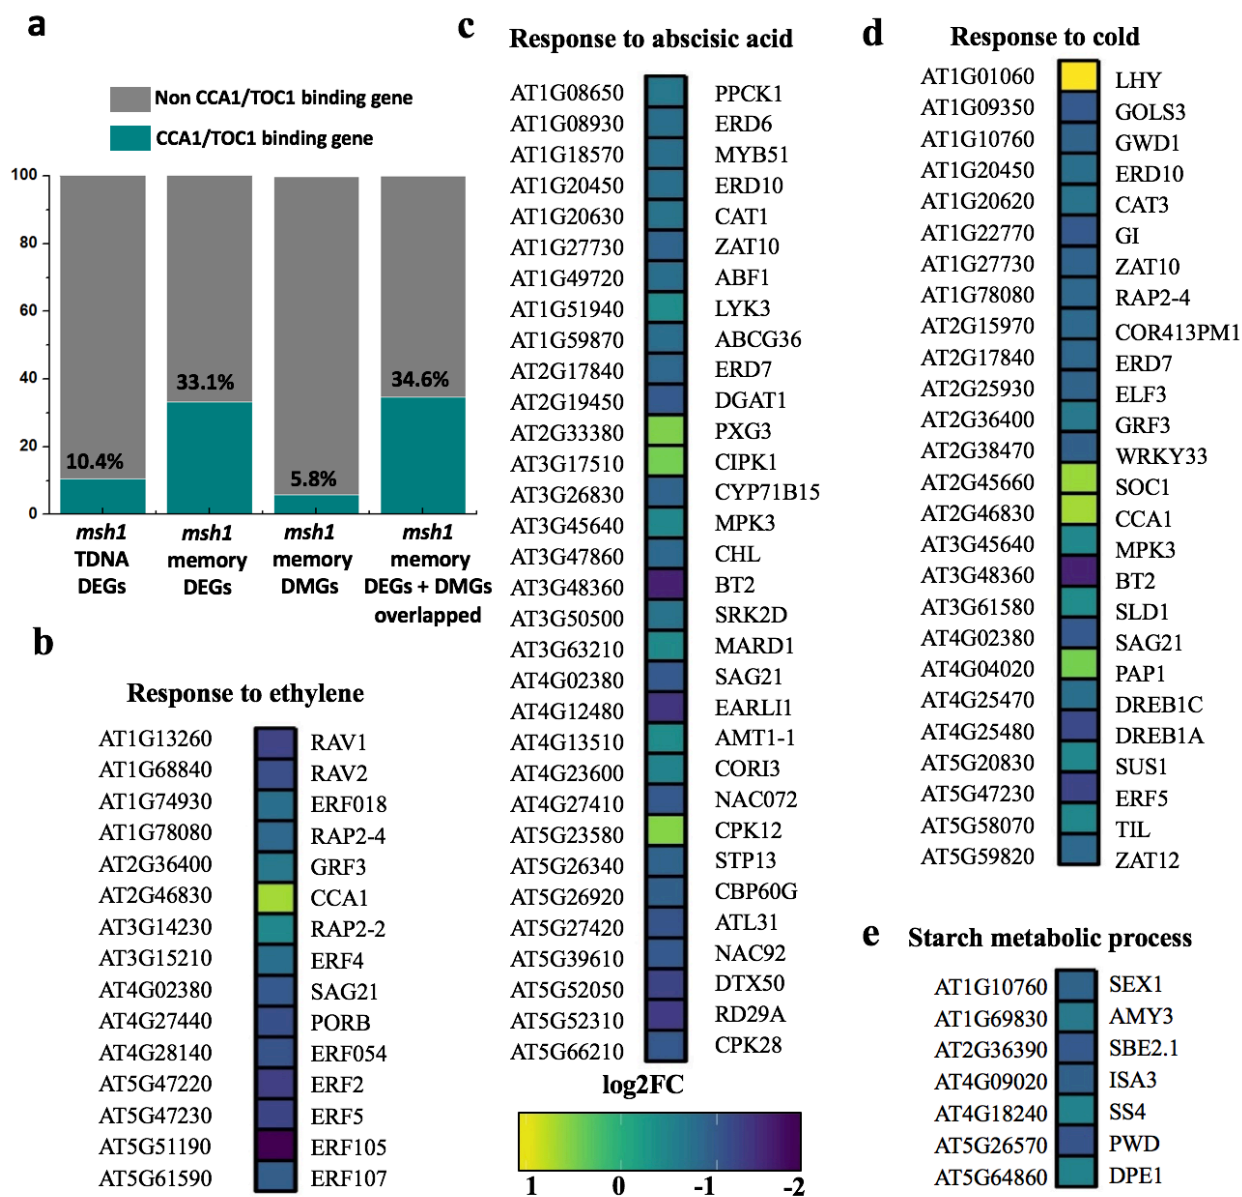

994

995 **Fig. 11** RNA-seq analysis of expression in circadian clock-regulated genes in the Arabidopsis *msh1*  
 996 memory line. (a) Genes under *TOC1* and *CCA1* regulation are represented at 10.4% in *msh1* TDNA  
 997 DEGs, increasing to 33.1% in *msh1* memory line DEGs. The analysis used published *CCA1* and *TOC1*  
 998 binding site CHIP-seq data [38, 64] and RNA-seq data from *msh1* TDNA and *msh1* memory line.  
 999 Selected, significantly altered, circadian clock-regulated pathways in *msh1* memory line are shown as (b)  
 1000 response to ethylene, (c) response to abscisic acid, (d) response to cold, and (e) starch metabolic process.  
 1001 Important genes in each pathway are listed with expression level, compared to wild type, indicated by  
 1002 color boxes. The full list of DEGs can be found in Additional File 6: Table S5 for *msh1* memory, and  
 1003 Additional File 7: Table S8 for *msh1* TDNA.

1004

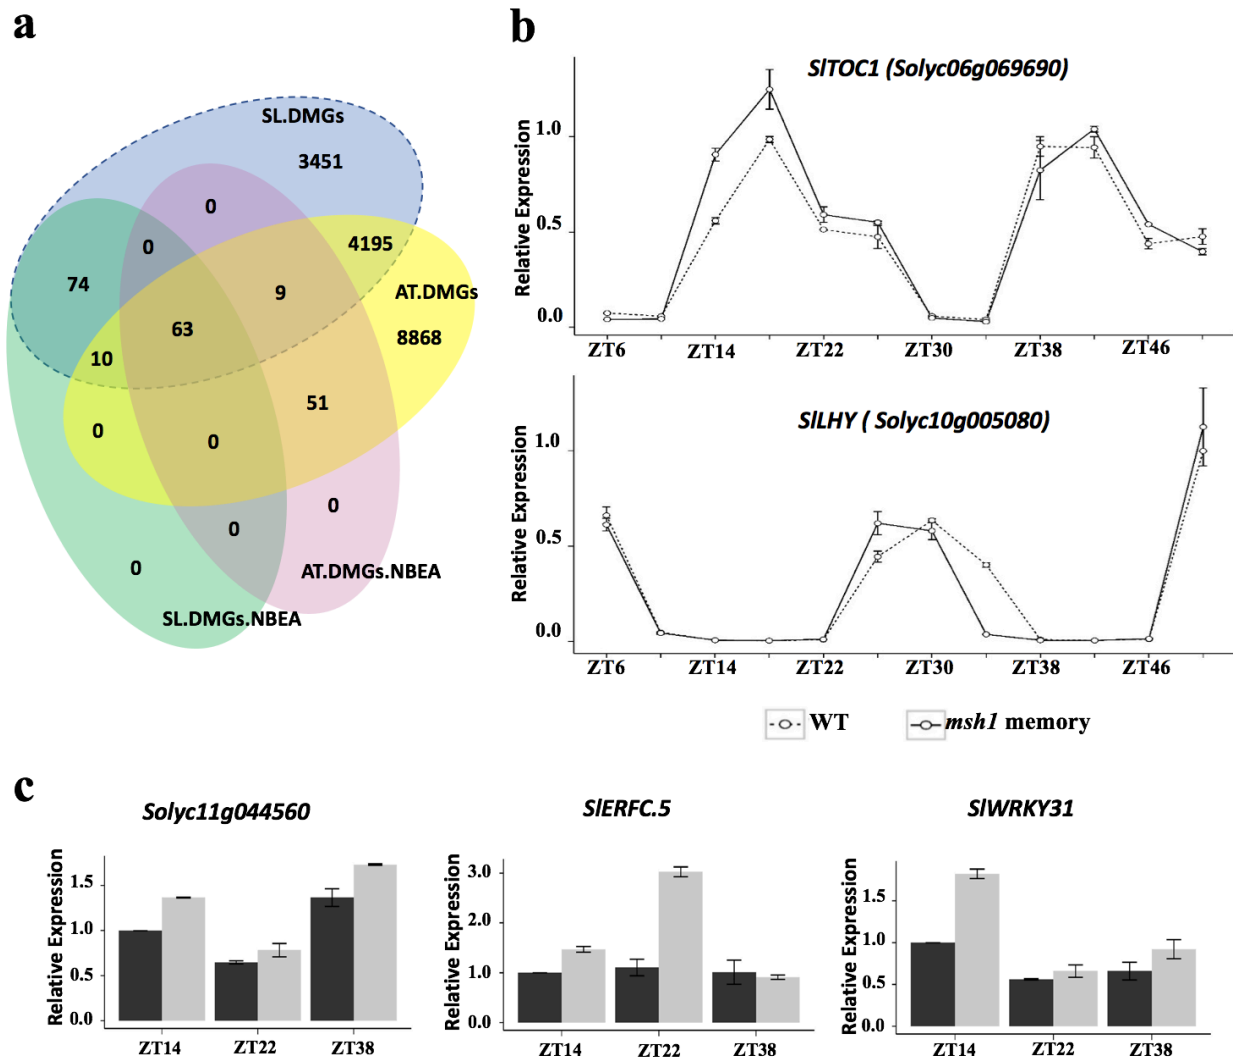

1005

1006 **Fig. 12** Testing altered methylation pattern, circadian rhythm core genes and downstream gene expression

1007 behavior in the tomato *msh1* memory line. (a) Venn Diagram for DMGs in tomato *msh1* memory (SL.

1008 DMGs) versus Arabidopsis *msh1* memory (AT. DMGs) and their corresponding NBEA subsets. For SL.

1009 DMGs, only the best two mappings of each tomato gene to an Arabidopsis locus, obtained with BLAST

1010 aligner, were taken into account. (b) Expression patterns of tomato *TOC1* and *LHY* in wild type (circle,

1011 dashed line) and *msh1* memory (circle, solid line) grown under LD (12 hours light, 12 hours dark) were

1012 assayed by quantitative real-time PCR. (c) The expression patterns of three circadian clock-regulated

1013 genes, *SLABF* (Solyc11g044560), *SIERFC.5* (Solyc02g077370), and *SIWRKY31* (Solyc06g066370) were

1014 assayed by quantitative real-time PCR under LD (12 hours light, 12 hours day) conditions. For both (b)

1015 and (c), relative expression was calculated by normalizing to the highest value of corresponding wild type

1016 in each biological replicate. Error bars represent mean  $\pm$  SD of three independent biological replicates.

1017

1018 **Tables**

1019 **Table 1.** Relative sensitivity differences between several statistical tests applied to identify differentially  
1020 methylated cytosines. P-values for the 2x2 contingency table with read counts  $n_i^{mC_c} = 8$ ,  $n_i^{C_c} = 2$ ,  
1021  $n_i^{mC_t} = 350$ , and  $n_i^{C_t} = 20$ .

| <b>Approach</b>                  | <b>p-value</b> |
|----------------------------------|----------------|
| FET                              | 0.108615       |
| FET one tail                     | 0.108615       |
| FET p.value MC 3k <sup>(1)</sup> | 0.1086         |
| RMST Boot 3k <sup>(2)</sup>      | 0.051          |
| HT Boot 3k <sup>(3)</sup>        | 0.050667       |
| Weibull ML1 CG <sup>(4)</sup>    | 0.000118       |
| Weibull ML2 CG <sup>(4)</sup>    | 1.67E-05       |
| Weibull ML3 CG <sup>(4)</sup>    | 2.21E-05       |

1022 <sup>1</sup>p.value simulated with Monte Carlo (MC) simulation with 3000 resamplings (3k). <sup>2</sup>Bootstrap goodness-of-fit  
1023 RMST as implemented in Methylpy [17]. <sup>3</sup>Bootstrap goodness-of-fit test based on Hellinger divergence estimated  
1024 according to the first statistic given Theorem 1 from reference [27]. <sup>3</sup>p-value based on the Weibull distribution for  
1025 memory lines (ML 1 to 3).  $n_i^{mC_c}$  refers to methylated cytosine counts in control,  $n_i^{C_c}$  refers to non-methylated  
1026 cytosine counts in control,  $n_i^{mC_t}$  refers to methylated cytosine counts in treatment and  $n_i^{C_t}$  refers to non-methylated  
1027 cytosine counts in treatment. The R script to compute RMST and H MC estimation is provided in GitLab:  
1028 <https://git.psu.edu/genomath/MethylIT>

1029

1030

1031



1032 **Table 2.** Network enrichment analysis test (NEAT) on the set of GO-biological process (BP-GO) for the  
 1033 differentially methylated genes in Ws-0 seed development dataset.  
 1034

| BP-GO                                                                         | NAB | Expected NAB | Adj. <i>p</i> -value |
|-------------------------------------------------------------------------------|-----|--------------|----------------------|
| GO:0000902 cell morphogenesis                                                 | 3   | 0.2492       | 0.00280              |
| GO:0006623 protein targeting to vacuole                                       | 4   | 0.299        | < 0.001              |
| GO:0006891 intra-Golgi vesicle-mediated transport                             | 4   | 0.3323       | < 0.001              |
| GO:0009723 response to ethylene                                               | 8   | 2.9072       | 0.00873              |
| GO:0009740 gibberellic acid mediated signaling pathway                        | 5   | 0.9802       | 0.00375              |
| GO:0009845 seed germination                                                   | 6   | 1.3456       | 0.00301              |
| GO:0009938 negative regulation of gibberellic acid mediated signaling pathway | 4   | 0.2658       | < 0.001              |
| GO:0010162 seed dormancy process                                              | 5   | 1.03         | 0.00434              |
| GO:0010187 negative regulation of seed germination                            | 3   | 0.4319       | 0.00916              |
| GO:0010325 raffinose family oligosaccharide biosynthetic process              | 5   | 0.3323       | 0.00102              |
| GO:0016049 cell growth                                                        | 3   | 0.3655       | 0.00640              |
| GO:0016192 vesicle-mediated transport                                         | 5   | 0.3987       | < 0.001              |
| GO:0016197 endosomal transport                                                | 2   | 0.0665       | 0.00280              |
| GO:0048444 floral organ morphogenesis                                         | 5   | 0.3323       | < 0.001              |
| GO:2000033 regulation of seed dormancy process                                | 3   | 0.1994       | 0.0017               |
| GO:2000377 regulation of reactive oxygen species metabolic process            | 4   | 0.4153       | 0.00154              |

1035  
 1036 Only over-enriched pathways are included  
 1037 NAB: observed number of (network) links from DMG list to GO term gene list  
 1038 Expected NAB: expected number of links from DMG list to GO term gene list (in absence of enrichment)  
 1039 Enrichment Fold: the ratio of NAB (observed number of network links) / expected nab (expected number of links)  
 1040  
 1041  
 1042  
 1043  
 1044  
 1045  
 1046  
 1047  
 1048  
 1049  
 1050  
 1051  
 1052  
 1053

1054 **Table 3.** Putative signature genes for *msh1* memory line

|     | Gene ID   | Alias | Short functional involving                                                          |
|-----|-----------|-------|-------------------------------------------------------------------------------------|
| 1*  | AT1G01060 | LHY   | Myb-related transcription factor involved in circadian rhythm                       |
| 2*  | AT1G22770 | GI    | GIGANTEA, circadian clock-controlled flowering pathway                              |
| 3*  | AT5G60100 | PRR3  | Affects the period of the circadian clock and seedlings                             |
| 4*  | AT1G04400 | CRY2  | Blue light signaling pathway (circadian rhythm). Positive flowering-time regulator  |
| 5*  | AT5G61380 | TOC1  | involved in the generation of circadian rhythms                                     |
| 6*  | AT2G46830 | CCA1  | Circadian clock associated 1, a transcriptional repressor.                          |
| 7*  | AT1G09570 | PHYA  | Phytochrome A. involved in the regulation of photomorphogenesis                     |
| 8*  | AT2G25930 | ELF3  | Required component of the core circadian clock regardless of light conditions       |
| 9*  | AT5G62430 | CDF1  | Circadian regulator of flowering time                                               |
| 10* | AT1G68050 | ADO3  | FKF1 protein clock-controlled. Regulates transition to flowering (circadian rhythm) |
| 11  | AT3G50500 | SRK2D | ABA signaling, activated by salt and non-ionic osmotic stress                       |
| 12  | AT5G25350 | EBF2  | EIN3-binding F-box protein involved in ethylene-activated signaling pathway         |
| 13  | AT1G49720 | ABF1  | Positive regulator of transcription in abscisic acid-activated signaling pathway    |
| 14  | AT3G50500 | SRK2D | ABA signaling during seed germination                                               |
| 15  | AT5G03730 | CTR1  | Negative regulator in the ethylene signal transduction pathway                      |
| 16  | AT2G27050 | EIL1  | Transcription factor activity involved in ethylene mediated signaling pathway       |

1055 Genes directly associated with plant circadian core component are indicated with “\*”

1056

1057 **Additional files**

1058 **Additional file 1: Figures S1 to S10**

1059

1060 **Additional file 2: Table S1** Absolute DIMPs counts and DIMPs counts per genomic region for seed  
1061 development and germination datasets

1062

1063 **Additional file 3: Table S2** DMGs Arabidopsis (ws-0) seed development dataset

1064

1065 **Additional file 4: Table S3** DMGs from Arabidopsis memory line

1066

1067 **Additional file 5 Table S4** List of seed development DMGs found in networks based on NEAT

1068

1069 **Additional file 6: Table S5** Total 955 of DEGs of Arabidopsis *msh1*-memory-line

1070

1071 **Additional file 7: Table S6** Total 9867 DMGs of Arabidopsis TDNA mutant

1072

1073 **Additional file 8: Table S7** NBEA analysis of DEGs in Arabidopsis msh1 memory line

1074

1075 **Additional file 9: Table S8** NEAT and NBEA analysis on DMGs from arabidopsis msh1 memory line

1076

1077 **Additional file 10: Table S9** DIMPs distribution in 16 regulatory genes in msh1 memory individual  
1078 plants

1079

1080 **Additional file 11: Table S10** DMGs in tomato msh1 memory line

1081

1082 **Additional file 12: Table S11** NBEA analysis of DMGs in tomato msh1 memory line

1083

1084 **Additional file 13: Table S12** Main intersection between Arabidopsis and tomato DMGs NBEA list

1085

1086 **Additional file 14: Table S13** Primers used in this paper

1087

## 1088 **References**

- 1089 1. Calarco JP, Borges F, Donoghue MTA, Van Ex F, Jullien PE, Lopes T, Gardner R,  
1090 Berger F, Feijo JA, Becker JD, Martienssen RA: Reprogramming of DNA Methylation  
1091 in Pollen Guides Epigenetic Inheritance via Small RNA. *Cell* 2012, 151:194-205.
- 1092 2. Schmitz RJ, Schultz MD, Lewsey MG, O'Malley RC, Urich MA, Libiger O, Schork NJ,  
1093 Ecker JR: Transgenerational Epigenetic Instability Is a Source of Novel Methylation  
1094 Variants. *Science* 2011, 334:369-373.
- 1095 3. Becker C, Hagmann J, Muller J, Koenig D, Stegle O, Borgwardt K, Weigel D:  
1096 Spontaneous epigenetic variation in the Arabidopsis thaliana methylome. *Nature*  
1097 2011, 480:245-U127.
- 1098 4. Matzke MA, Mosher RA: RNA-directed DNA methylation: an epigenetic pathway of  
1099 increasing complexity (vol 15, 394, 2014). *Nature Reviews Genetics* 2014, 15.
- 1100 5. Crisp PA, Ganguly D, Eichten SR, Borevitz JO, Pogson BJ: Reconsidering plant  
1101 memory: Intersections between stress recovery, RNA turnover, and epigenetics.  
1102 *Science Advances* 2016, 2.

- 1103 6. Kinoshita T, Seki M: Epigenetic Memory for Stress Response and Adaptation in  
1104 Plants. *Plant and Cell Physiology* 2014, 55:1859-1863.
- 1105 7. Colaneri AC, Jones AM: Genome-Wide Quantitative Identification of DNA  
1106 Differentially Methylated Sites in Arabidopsis Seedlings Growing at Different Water  
1107 Potential. *Plos One* 2013, 8.
- 1108 8. Jenkinson G, Pujadas E, Goutsias J, Feinberg AP: Potential energy landscapes identify  
1109 the information-theoretic nature of the epigenome. *Nature Genetics* 2017, 49:719-+.
- 1110 9. Sanchez R, Mackenzie SA: Information Thermodynamics of Cytosine DNA  
1111 Methylation. *Plos One* 2016, 11.
- 1112 10. Sanchez R, Mackenzie SA: Genome-Wide Discriminatory Information Patterns of  
1113 Cytosine DNA Methylation. *International Journal of Molecular Sciences* 2016, 17.
- 1114 11. Greiner M, Pfeiffer D, Smith RD: Principles and practical application of the receiver-  
1115 operating characteristic analysis for diagnostic tests. *Prev Vet Med* 2000, 45:23-41.
- 1116 12. Carter JV, Pan J, Rai SN, Galandiuk S: ROC-ing along: Evaluation and interpretation of  
1117 receiver operating characteristic curves. *Surgery* 2016, 159:1638-1645.
- 1118 13. Harpaz R, DuMouchel W, LePendou P, Bauer-Mehren A, Ryan P, Shah NH:  
1119 Performance of pharmacovigilance signal-detection algorithms for the FDA adverse  
1120 event reporting system. *Clin Pharmacol Ther* 2013, 93:539-546.
- 1121 14. Kruspe S, Dickey DD, Urak KT, Blanco GN, Miller MJ, Clark KC, Burghardt E, Gutierrez  
1122 WR, Phadke SD, Kamboj S, et al: Rapid and Sensitive Detection of Breast Cancer Cells  
1123 in Patient Blood with Nuclease-Activated Probe Technology. *Mol Ther Nucleic Acids*  
1124 2017, 8:542-557.
- 1125 15. Wu H, Xu T, Feng H, Chen L, Li B, Yao B, Qin Z, Jin P, Conneely KN: Detection of  
1126 differentially methylated regions from whole-genome bisulfite sequencing data  
1127 without replicates. *Nucleic Acids Res* 2015, 43:e141.
- 1128 16. Hebestreit K, Dugas M, Klein HU: Detection of significantly differentially methylated  
1129 regions in targeted bisulfite sequencing data. *Bioinformatics* 2013, 29:1647-1653.
- 1130 17. Schultz MD, He Y, Whitaker JW, Hariharan M, Mukamel EA, Leung D, Rajagopal N,  
1131 Nery JR, Urich MA, Chen H, et al: Human body epigenome maps reveal noncanonical  
1132 DNA methylation variation. *Nature* 2015, 523:212-216.

- 1133 18. Kawakatsu T, Nery JR, Castanon R, Ecker JR: Dynamic DNA methylation  
1134 reconfiguration during seed development and germination. *Genome Biol* 2017,  
1135 18:171.
- 1136 19. Viridi KS, Laurie JD, Xu YZ, Yu JT, Shao MR, Sanchez R, Kundariya H, Wang D,  
1137 Riethoven JJM, Wamboldt Y, et al: Arabidopsis MSH1 mutation alters the epigenome  
1138 and produces heritable changes in plant growth. *Nature Communications* 2015, 6.
- 1139 20. Viridi KS, Wamboldt Y, Kundariya H, Laurie JD, Keren I, Kumar KRS, Block A, Basset  
1140 G, Luebker S, Elowsky C, et al: MSH1 Is a Plant Organellar DNA Binding and  
1141 Thylakoid Protein under Precise Spatial Regulation to Alter Development. *Molecular*  
1142 *Plant* 2016, 9:245-260.
- 1143 21. Davila JI, Arrieta-Montiel MP, Wamboldt Y, Cao J, Hagmann J, Shedge V, Xu YZ,  
1144 Weigel D, Mackenzie SA: Double-strand break repair processes drive evolution of  
1145 the mitochondrial genome in Arabidopsis. *Bmc Biology* 2011, 9.
- 1146 22. Xu YZ, Arrieta-Montiel MP, Viridi KS, de Paula WBM, Widhalm JR, Basset GJ, Davila JI,  
1147 Elthon TE, Elowsky CG, Sato SJ, et al: MutS HOMOLOG1 Is a Nucleoid Protein That  
1148 Alters Mitochondrial and Plastid Properties and Plant Response to High Light. *Plant*  
1149 *Cell* 2011, 23:3428-3441.
- 1150 23. Xu YZ, Santamaria RD, Viridi KS, Arrieta-Montiel MP, Razvi F, Li SQ, Ren GD, Yu B,  
1151 Alexander D, Guo LN, et al: The Chloroplast Triggers Developmental  
1152 Reprogramming When MUTS HOMOLOG1 Is Suppressed in Plants. *Plant Physiology*  
1153 2012, 159:710-+.
- 1154 24. Shao MR, Raju SKK, Laurie JD, Sanchez R, Mackenzie SA: Stress-responsive pathways  
1155 and small RNA changes distinguish variable developmental phenotypes caused by  
1156 MSH1 loss. *Bmc Plant Biology* 2017, 17.
- 1157 25. Mónica López-Ratón MXR-Á, Carmen Cadarso-Suárez, Francisco Gude-Sampedro:  
1158 OptimalCutpoints: An R Package for Selecting Optimal Cutpoints in Diagnostic Tests.  
1159 *Journal of statistical software* 2014, Vol 61 (2014):4896.
- 1160 26. William Perkins MT, Rachel Ward: Computing the confidence levels for a root-mean-  
1161 square test of goodness-of-fit. *Applied Mathematics and Computation* 2011, Volume  
1162 217:Pages 9072-9084.

- 1163 27. F. Liese IV: On Divergences and Informations in Statistics and Information Theory.  
1164 IEEE Transactions on Information Theory 2006, Volume: 52:4394 - 4412.
- 1165 28. Le BH, Cheng C, Bui AQ, Wagmaister JA, Henry KF, Pelletier J, Kwong L, Belmonte M,  
1166 Kirkbride R, Horvath S, et al: Global analysis of gene activity during Arabidopsis  
1167 seed development and identification of seed-specific transcription factors. Proc Natl  
1168 Acad Sci U S A 2010, 107:8063-8070.
- 1169 29. Bassel GW, Lan H, Glaab E, Gibbs DJ, Gerjets T, Krasnogor N, Bonner AJ, Holdsworth  
1170 MJ, Provart NJ: Genome-wide network model capturing seed germination reveals  
1171 coordinated regulation of plant cellular phase transitions. Proc Natl Acad Sci U S A  
1172 2011, 108:9709-9714.
- 1173 30. Yang XD, Kundariya H, Xu YZ, Sandhu A, Yu JT, Hutton SF, Zhang MF, Mackenzie SA:  
1174 MutS HOMOLOG1-Derived Epigenetic Breeding Potential in Tomato. Plant  
1175 Physiology 2015, 168:222-U390.
- 1176 31. Sanchez SE, Kay SA: The Plant Circadian Clock: From a Simple Timekeeper to a  
1177 Complex Developmental Manager. Cold Spring Harbor Perspectives in Biology 2016,  
1178 8.
- 1179 32. Lefebvre A, Mauffret O, el Antri S, Monnot M, Lescot E, Fermandjian S: Sequence  
1180 dependent effects of CpG cytosine methylation. A joint 1H-NMR and 31P-NMR study.  
1181 Eur J Biochem 1995, 229:445-454.
- 1182 33. Nathan D, Crothers DM: Bending and flexibility of methylated and unmethylated  
1183 EcoRI DNA. J Mol Biol 2002, 316:7-17.
- 1184 34. Severin PM, Zou X, Gaub HE, Schulten K: Cytosine methylation alters DNA  
1185 mechanical properties. Nucleic Acids Res 2011, 39:8740-8751.
- 1186 35. Huang SC, Ecker JR: Piecing together cis-regulatory networks: insights from  
1187 epigenomics studies in plants. Wiley Interdiscip Rev Syst Biol Med 2017.
- 1188 36. Marchal C, Miotto B: Emerging concept in DNA methylation: role of transcription  
1189 factors in shaping DNA methylation patterns. J Cell Physiol 2015, 230:743-751.
- 1190 37. Naftelberg S, Schor IE, Ast G, Kornblihtt AR: Regulation of Alternative Splicing  
1191 Through Coupling with Transcription and Chromatin Structure. Annual Review of  
1192 Biochemistry, Vol 84 2015, 84:165-198.

- 1193 38. Nagel DH, Doherty CJ, Pruneda-Paz JL, Schmitz RJ, Ecker JR, Kay SA: Genome-wide  
1194 identification of CCA1 targets uncovers an expanded clock network in Arabidopsis.  
1195 Proceedings of the National Academy of Sciences of the United States of America  
1196 2015, 112:E4802-E4810.
- 1197 39. De Lucia F, Crevillen P, Jones AME, Greb T, Dean C: A PHD-Polycomb Repressive  
1198 Complex 2 triggers the epigenetic silencing of FLC during vernalization. Proceedings  
1199 of the National Academy of Sciences of the United States of America 2008,  
1200 105:16831-16836.
- 1201 40. Grundy J, Stoker C, Carre IA: Circadian regulation of abiotic stress tolerance in  
1202 plants. *Frontiers in Plant Science* 2015, 6.
- 1203 41. Lee KH, Piao HL, Kim HY, Choi SM, Jiang F, Hartung W, Hwang I, Kwak JM, Lee IJ,  
1204 Hwang I: Activation of glucosidase via stress-induced polymerization rapidly  
1205 increases active pools of abscisic acid. *Cell* 2006, 126:1109-1120.
- 1206 42. Legnaioli T, Cuevas J, Mas P: TOC1 functions as a molecular switch connecting the  
1207 circadian clock with plant responses to drought. *Embo Journal* 2009, 28:3745-3757.
- 1208 43. Graf A, Schlereth A, Stitt M, Smith AM: Circadian control of carbohydrate availability  
1209 for growth in Arabidopsis plants at night. Proceedings of the National Academy of  
1210 Sciences of the United States of America 2010, 107:9458-9463.
- 1211 44. Ni ZF, Kim ED, Ha MS, Lackey E, Liu JX, Zhang YR, Sun QX, Chen ZJ: Altered circadian  
1212 rhythms regulate growth vigour in hybrids and allopolyploids. *Nature* 2009,  
1213 457:327-U327.
- 1214 45. Miller M, Song QX, Shi XL, Juenger TE, Chen ZJ: Natural variation in timing of stress-  
1215 responsive gene expression predicts heterosis in intraspecific hybrids of  
1216 Arabidopsis. *Nature Communications* 2015, 6.
- 1217 46. Krueger F, Andrews SR: Bismark: a flexible aligner and methylation caller for  
1218 Bisulfite-Seq applications. *Bioinformatics* 2011, 27:1571-1572.
- 1219 47. Prezza N, Vezzi F, Kaller M, Policriti A: Fast, accurate, and lightweight analysis of BS-  
1220 treated reads with ERNE 2. *Bmc Bioinformatics* 2016, 17.
- 1221 48. Steerneman T: On the Total Variation and Hellinger Distance between Signed  
1222 Measures - an Application to Product Measures. Proceedings of the American  
1223 Mathematical Society 1983, 88:684-688.

- 1224 49. R\_Core\_Team: A language and environment for statistical computing. 2016.
- 1225 50. Hippenstiel RD: Detection Theory: Applications and Digital Signal Processing. CRC  
1226 Press 2001.
- 1227 51. Stanislaw H, Todorov N: Calculation of signal detection theory measures. Behavior  
1228 Research Methods Instruments & Computers 1999, 31:137-149.
- 1229 52. Youden WJ: Index for rating diagnostic tests. Cancer 1950, 3:32-35.
- 1230 53. Perkins NJ, Schisterman EF: The inconsistency of "optimal" cutpoints obtained using  
1231 two criteria based on the receiver operating characteristic curve. Am J Epidemiol  
1232 2006, 163:670-675.
- 1233 54. Carstensen B, Plummer, M., Laara, E. & Hills, M.: Epi:A Package for Statistical  
1234 Analysis in Epidemiology. R package version 27 2016.
- 1235 55. Love MI, Huber W, Anders S: Moderated estimation of fold change and dispersion  
1236 for RNA-seq data with DESeq2. Genome Biology 2014, 15.
- 1237 56. He Y, Gorkin DU, Dickel DE, Nery JR, Castanon RG, Lee AY, Shen Y, Visel A,  
1238 Pennacchio LA, Ren B, Ecker JR: Improved regulatory element prediction based on  
1239 tissue-specific local epigenomic signatures. Proc Natl Acad Sci U S A 2017,  
1240 114:E1633-E1640.
- 1241 57. Langmead B, Salzberg SL: Fast gapped-read alignment with Bowtie 2. Nature  
1242 Methods 2012, 9:357-U354.
- 1243 58. Wang XF, Yu XQ, Zhu W, McCombie WR, Antoniou E, Powers RS, Davidson NO, Li E,  
1244 Williams J: A trimming-and-retrieving alignment scheme for reduced representation  
1245 bisulfite sequencing. Bioinformatics 2015, 31:2040-2042.
- 1246 59. Geistlinger L, Csaba G, Zimmer R: Bioconductor's EnrichmentBrowser: seamless  
1247 navigation through combined results of set- & network-based enrichment analysis.  
1248 BMC Bioinformatics 2016, 17.
- 1249 60. Signorelli M, Vinciotti V, Wit EC: NEAT: an efficient network enrichment analysis  
1250 test. BMC Bioinformatics 2016, 17.
- 1251 61. Bustin SA, Benes V, Garson JA, Hellemans J, Huggett J, Kubista M, Mueller R, Nolan T,  
1252 Pfaffl MW, Shipley GL, et al: The MIQE Guidelines: Minimum Information for  
1253 Publication of Quantitative Real-Time PCR Experiments. Clinical Chemistry 2009,  
1254 55:611-622.



- 1255 62. Grant GR, Farkas MH, Pizarro AD, Lahens NF, Schug J, Brunk BP, Stoeckert CJ,  
1256 Hogenesch JB, Pierce EA: Comparative analysis of RNA-Seq alignment algorithms  
1257 and the RNA-Seq unified mapper (RUM). *Bioinformatics* 2011, 27:2518-2528.
- 1258 63. Hartley SW, Mullikin JC: QoRTs: a comprehensive toolset for quality control and data  
1259 processing of RNA-Seq experiments. *Bmc Bioinformatics* 2015, 16.
- 1260 64. Huang W, Perez-Garcia P, Pokhilko A, Millar AJ, Antoshechkin I, Riechmann JL, Mas  
1261 P: Mapping the Core of the Arabidopsis Circadian Clock Defines the Network  
1262 Structure of the Oscillator. *Science* 2012, 336:75-79.
- 1263
